# Supplementary material for: Probing the role of electrostatics of polypeptide main-chain in protein folding by perturbing N-terminal residue stereochemistry: DFT study with oligoalanine models
Source: Royal Society of Chemistry journal article supplement (doi:10.1039/c6ra22870d), 2016-01-01
Supplement: c6ra22870d1.pdf [file c6ra22870d1.pdf]

**Electronic supplementary information (ESI)**

**Probing the role of electrostatics of polypeptide main-chain in protein folding by  
perturbing N-terminal residue stereochemistry: A DFT study with oligoalanine models**

Bhupesh Goyal,\* Kinshuk Raj Srivastava, Anil Kumar, G. Naresh Patwari, and Susheel  
Durani\*

Department of Chemistry, Indian Institute of Technology Bombay,

Mumbai-400076, India

\*Corresponding author

E-mail address: [bhupesh@iitbombay.org](mailto:bhupesh@iitbombay.org)

**Present Address**

<sup>1</sup>Department of Chemistry, School of Basic and Applied Sciences, Sri Guru Granth Sahib  
World University, Fatehgarh Sahib-140406, Punjab, India

<sup>2</sup>Department of Chemistry, University of Toronto, Toronto, ON, M5S 3H6

<sup>3</sup>Department of Physics and Astronomy, Michigan State University, East Lansing, USA

## Table of Contents

|                                                                                                                                                                                                                                                                                                                                                                                                                                                                                                                                                                                                                                                                                                           |    |
|-----------------------------------------------------------------------------------------------------------------------------------------------------------------------------------------------------------------------------------------------------------------------------------------------------------------------------------------------------------------------------------------------------------------------------------------------------------------------------------------------------------------------------------------------------------------------------------------------------------------------------------------------------------------------------------------------------------|----|
| <b>Fig. S1.</b> Interactions of peptides <b>a</b> , <b>b</b> , <b>c</b> , and <b>d</b> of residues <b>i</b> , <b>ii</b> , and <b>iii</b> shown as curved lines define sequence-local electrostatics ( $C_{\text{local}}$ ). Interactions of peptides <b>a</b> and <b>d</b> , and of <b>a</b> and <b>c</b> characterizing $\alpha$ -helix and $3_{10}$ -helix hydrogen bonds ( $C_{\text{Hb}}$ ) are noted to be excluded from $C_{\text{local}}$ . Interactions characterizing $C_{\text{local}}$ are noted to encompass the chain segments that define $C_{\text{local}}$ .                                                                                                                              | 4  |
| <b>Fig. S2.</b> Enthalpy change ( $\Delta H_{\text{E}\rightarrow\text{F}}$ , $\Delta H_{\text{M}}$ ) and free energy change ( $\Delta G_{\text{E}\rightarrow\text{F}}$ , $\Delta G_{\text{M}}$ ) (kcal/mol) in folding (subscript E $\rightarrow$ F) of end-protected tetraalanine ( <b>Ia</b> , <b>Ib</b> ) from $^{\text{L/D}}\text{E}$ to $^{\text{L/D}}\text{F}$ structures and their mutation of the folds (subscript M) from $^{\text{L}}\text{E}/^{\text{L}}\text{F}$ to $^{\text{D}}\text{E}/^{\text{D}}\text{F}$ structures in vacuum, showing the accompanying changes in $\varphi$ , $\psi$ 's and hydrogen bonds.                                                                             | 5  |
| <b>Fig. S3.</b> Enthalpy change ( $\Delta H_{\text{E}\rightarrow\text{F}}$ , $\Delta H_{\text{M}}$ ) and free energy change ( $\Delta G_{\text{E}\rightarrow\text{F}}$ , $\Delta G_{\text{M}}$ ) (kcal/mol) in folding (subscript E $\rightarrow$ F) of end-protected proline ( <b>IIa</b> , <b>IIb</b> ) peptides from $^{\text{L/D}}\text{E}$ to $^{\text{L/D}}\text{F}$ structures and their mutation of the folds (subscript M) from $^{\text{L}}\text{E}/^{\text{L}}\text{F}$ to $^{\text{D}}\text{E}/^{\text{D}}\text{F}$ structures in vacuum, showing the accompanying changes in $\varphi$ , $\psi$ 's and hydrogen bonds.                                                                       | 6  |
| <b>Fig. S4.</b> Enthalpy change ( $\Delta H_{\text{E}\rightarrow\text{F}}$ , $\Delta H_{\text{M}}$ ) and free energy change ( $\Delta G_{\text{E}\rightarrow\text{F}}$ , $\Delta G_{\text{M}}$ ) (kcal/mol) in folding (subscript E $\rightarrow$ F) of end-protected diproline ( <b>IIIa</b> , <b>IIIb</b> ) peptides from $^{\text{L/D}}\text{E}$ to $^{\text{L/D}}\text{F}$ structures and their mutation of the folds (subscript M) from $^{\text{L}}\text{E}/^{\text{L}}\text{F}$ to $^{\text{D}}\text{E}/^{\text{D}}\text{F}$ structures in vacuum, showing the accompanying changes in $\varphi$ , $\psi$ 's and hydrogen bonds.                                                                   | 7  |
| <b>Fig. S5.</b> Enthalpy change ( $\Delta H_{\text{E}\rightarrow\text{F}}$ , $\Delta H_{\text{M}}$ ) and free energy change ( $\Delta G_{\text{E}\rightarrow\text{F}}$ , $\Delta G_{\text{M}}$ ) (kcal/mol) in folding (subscript E $\rightarrow$ F) of end-protected tetraalanine ( <b>Ia</b> , <b>Ib</b> ) from $^{\text{L/D}}\text{E}$ to $^{\text{L/D}}\text{F}$ structures and their mutation of the folds (subscript M) from $^{\text{L}}\text{E}/^{\text{L}}\text{F}$ to $^{\text{D}}\text{E}/^{\text{D}}\text{F}$ structures in solvent, showing the accompanying changes in $\varphi$ , $\psi$ 's and hydrogen bonds.                                                                            | 8  |
| <b>Fig. S6.</b> Enthalpy change ( $\Delta H_{\text{S}\rightarrow\text{F}}$ , $\Delta H_{\text{M}}$ ) and free energy change ( $\Delta G_{\text{S}\rightarrow\text{F}}$ , $\Delta G_{\text{M}}$ ) (kcal/mol) in folding (subscript S $\rightarrow$ F) of end-protected tetraalanine ( <b>Ia</b> , <b>Ib</b> ) from $^{\text{L/D}}\text{S}$ to $^{\text{L/D}}\text{F}$ structures and their mutation of the folds (subscript M) from $^{\text{L}}\text{S}/^{\text{L}}\text{F}$ to $^{\text{D}}\text{S}/^{\text{D}}\text{F}$ structures in solvent, showing the accompanying changes in $\varphi$ , $\psi$ 's and hydrogen bonds.                                                                            | 9  |
| <b>Fig. S7.</b> The end-protected proline ( <b>IIa</b> , <b>IIb</b> ) and diproline ( <b>IIIa</b> , <b>IIIb</b> ) peptides as $3_{10}$ -helix ( $^{\text{L}}\text{F}$ ) and $^{\text{D}}$ PPH-capped- $3_{10}$ -helix ( $^{\text{D}}\text{F}$ ) folds are identical in the donor-acceptor specificity of backbone hydrogen bonds, however, distinct in the geometry of dipoles of backbone peptide units due to a $\sim 90^\circ$ tilt in the dipole of a backbone peptide unit caused by the L- to D-stereochemical mutation of the N-terminal residue. The model peptides are shown in stick representation with hydrogen bonds between backbone CO and NH groups shown as dashed line in brown colour. | 10 |
| <b>Fig. S8.</b> Minimum energy conformers of end-protected tetraalanine ( <b>Ia</b> ) achieved from different starting structures in correspondence of polyproline-II and extended                                                                                                                                                                                                                                                                                                                                                                                                                                                                                                                        | 11 |

$\beta$ -conformation. All minima are extended  $\beta$ -structures with exception of one structure having a terminal residue locked in a hydrogen-bonded  $\gamma$ -turn structure.

**Fig. S9.** Optimized geometry in end-protected tetraalanine (**Ia**) achieved in independent runs of optimization starting with  $3_{10}$ -helical folds varied by  $\pm 5^\circ$  in  $\varphi$ ,  $\psi$ 's. The optimized structures converge to similar conformation irrespective of the starting conformation. 12

**Table S1.** Specific dihedral angles for **E** and **F** folds of end-protected tetraalanine (**Ia**, **Ib**), proline (**IIa**, **IIb**) and diproline (**IIIa**, **IIIb**) peptides in correspondence of the optimized structures obtained in vacuum. 13

**Table S2.** Specific dihedral angles for **E**, **S** and **F** folds of end-protected tetraalanine (**Ia**, **Ib**) in correspondence of the optimized structures obtained in presence of solvent. 14

**Table S3.** Thermodynamic parameters for **E**, **S** and **F** folds of end-protected tetraalanine (**Ia**, **Ib**), proline (**IIa**, **IIb**) and diproline (**IIIa**, **IIIb**) peptides in correspondence of the optimized structures obtained in vacuum and in presence of solvent. 15

Cartesian coordinates of the optimized geometries of end-protected tetraalanine (**Ia**, **Ib**), proline (**IIa**, **IIb**) and diproline (**IIIa**, **IIIb**) peptides in fully-extended ( ${}^L\mathbf{E}$  and  ${}^D\mathbf{E}$ ), fully-folded structures ( ${}^L\mathbf{F}$  and  ${}^D\mathbf{F}$ ) and  ${}^D$ PPH-capped- $3_{10}$ -helix folds in vacuum. 16–30

Cartesian coordinates of the optimized geometries of end-protected tetraalanine (**Ia**, **Ib**) in fully-extended ( ${}^L\mathbf{E}$  and  ${}^D\mathbf{E}$ ), semi-extended ( ${}^L\mathbf{S}$  and  ${}^D\mathbf{S}$ ), and fully-folded structures ( ${}^L\mathbf{F}$  and  ${}^D\mathbf{F}$ ) in presence of solvent. 31–37

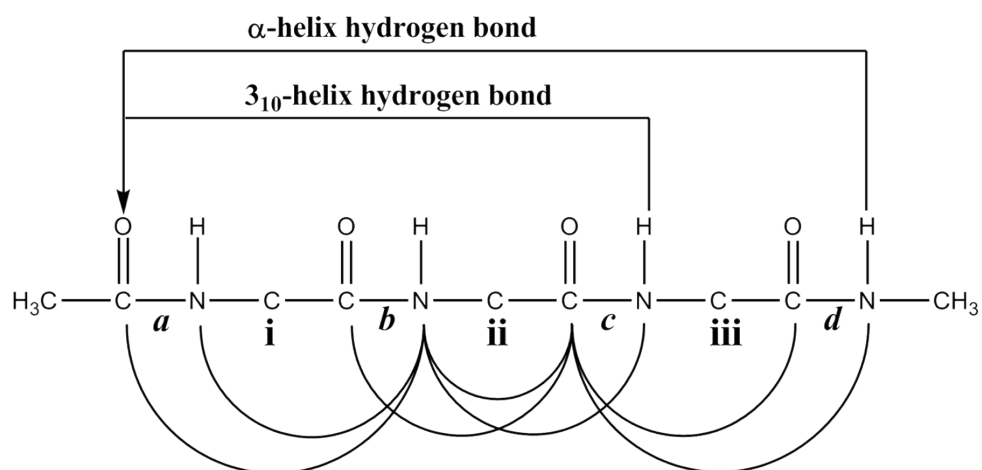

**Fig. S1.** Interactions of peptides **a**, **b**, **c**, and **d** of residues **i**, **ii**, and **iii** shown as curved lines define sequence-local electrostatics ( $C_{\text{local}}$ ). Interactions of peptides **a** and **d**, and of **a** and **c** characterizing  $\alpha$ -helix and  $3_{10}$ -helix hydrogen bonds ( $C_{\text{Hb}}$ ) are noted to be excluded from  $C_{\text{local}}$ . Interactions characterizing  $C_{\text{local}}$  are noted to encompass the chain segments that define  $C_{\text{local}}$ .

**Ia**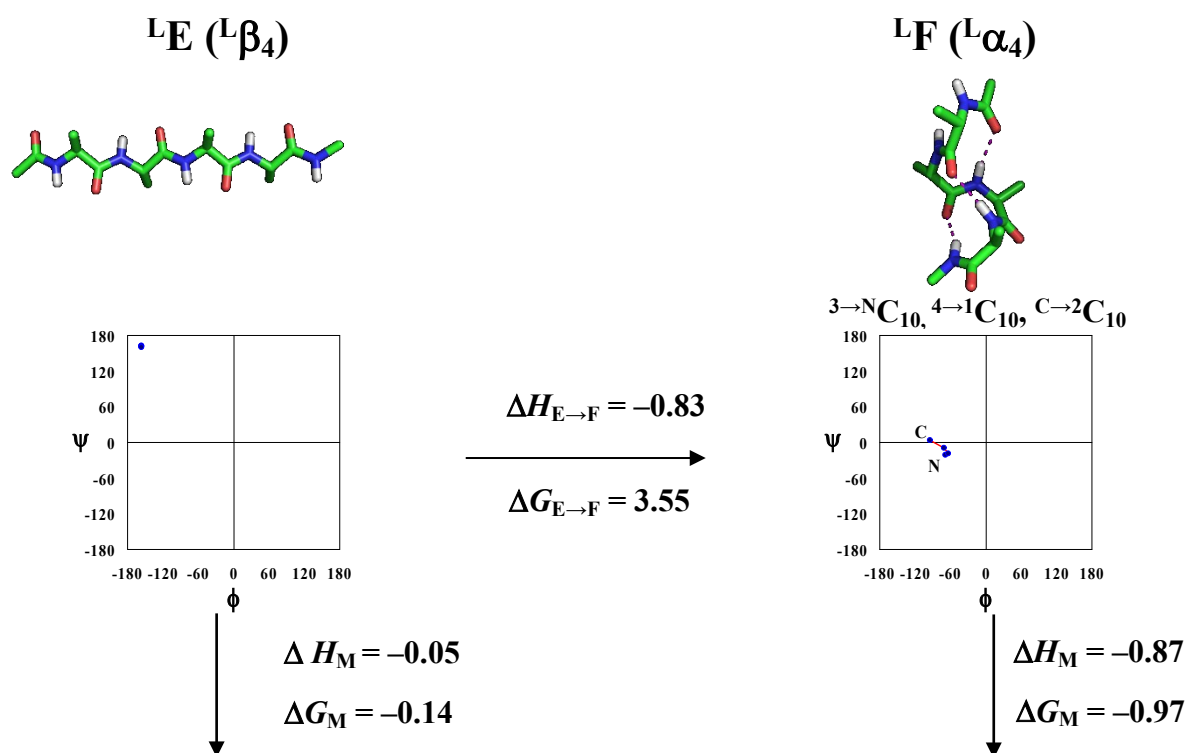**Ib**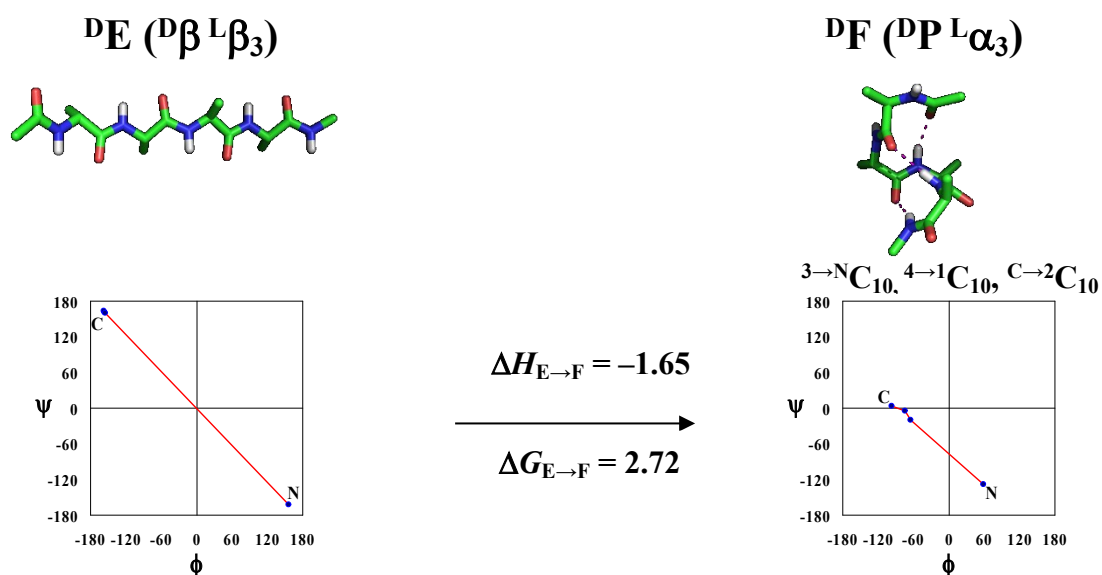

**Fig. S2.** Enthalpy change ( $\Delta H_{E \rightarrow F}$ ,  $\Delta H_M$ ) and free energy change ( $\Delta G_{E \rightarrow F}$ ,  $\Delta G_M$ ) (kcal/mol) in folding (subscript E→F) of end-protected tetraalanine (**Ia**, **Ib**) from <sup>L/D</sup>E to <sup>L/D</sup>F structures and their mutation of the folds (subscript M) from <sup>L</sup>E/<sup>L</sup>F to <sup>D</sup>E/<sup>D</sup>F structures in vacuum, showing the accompanying changes in  $\phi$ ,  $\psi$ 's and hydrogen bonds.

## IIa

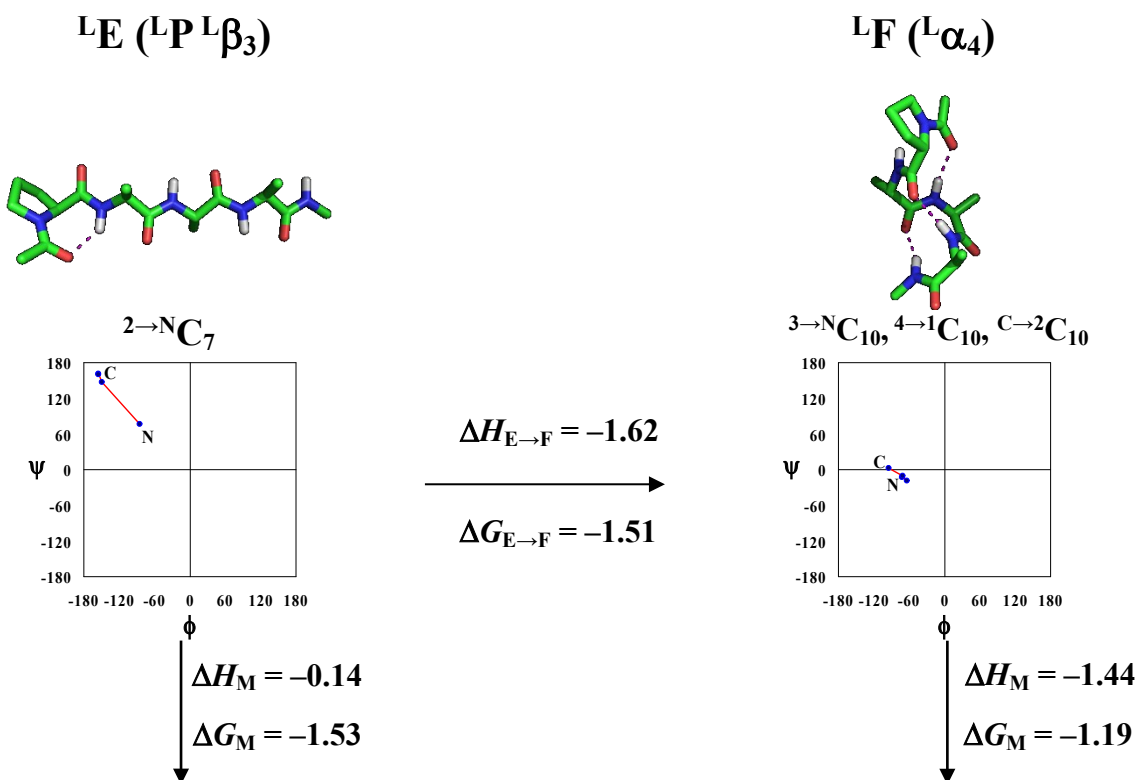

## IIb

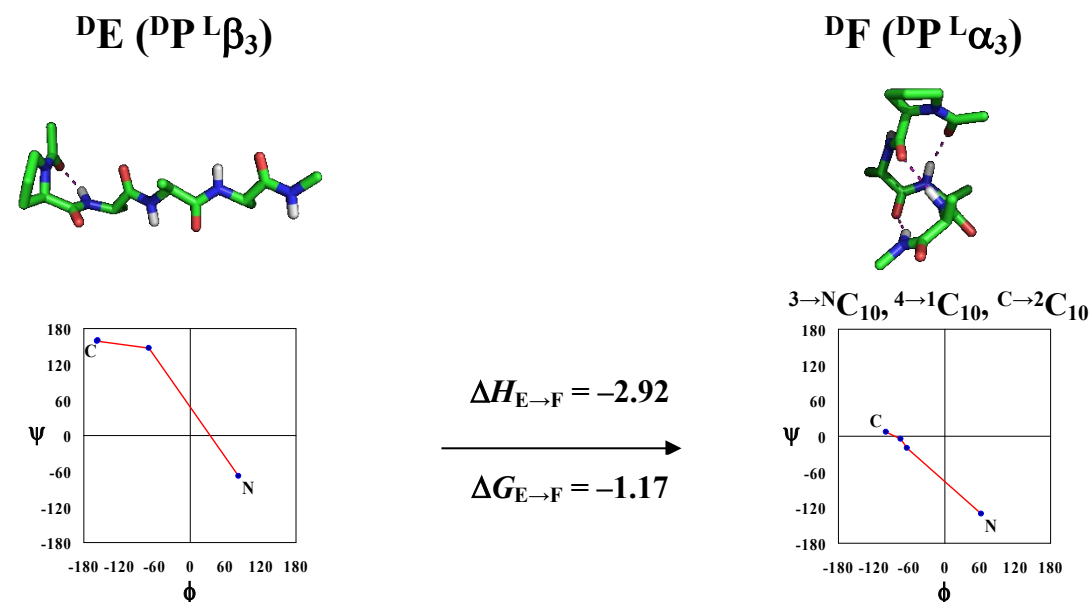

**Fig. S3.** Enthalpy change ( $\Delta H_{\text{E} \rightarrow \text{F}}$ ,  $\Delta H_{\text{M}}$ ) and free energy change ( $\Delta G_{\text{E} \rightarrow \text{F}}$ ,  $\Delta G_{\text{M}}$ ) (kcal/mol) in folding (subscript E $\rightarrow$ F) of end-protected proline (**IIa**, **IIb**) peptides from  ${}^L/\text{D}\mathbf{E}$  to  ${}^L/\text{D}\mathbf{F}$  structures and their mutation of the folds (subscript M) from  ${}^L\mathbf{E}/{}^L\mathbf{F}$  to  ${}^D\mathbf{E}/{}^D\mathbf{F}$  structures in vacuum, showing the accompanying changes in  $\phi$ ,  $\psi$ 's and hydrogen bonds.

### IIIa

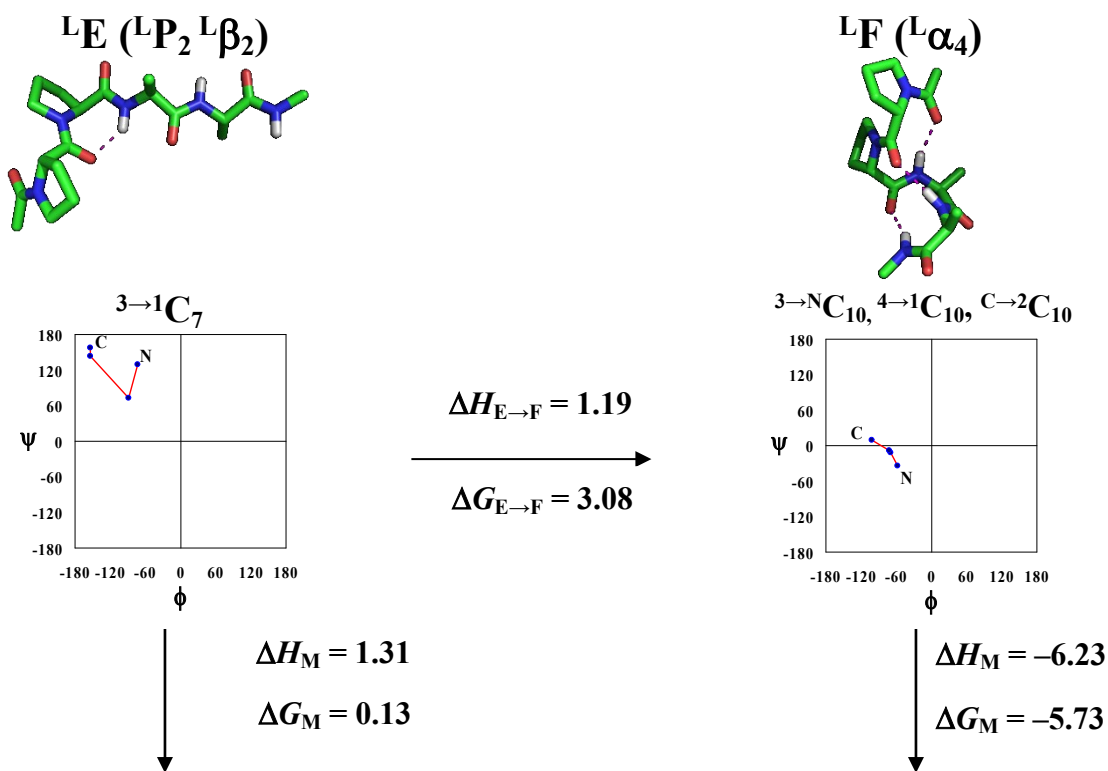

### IIIb

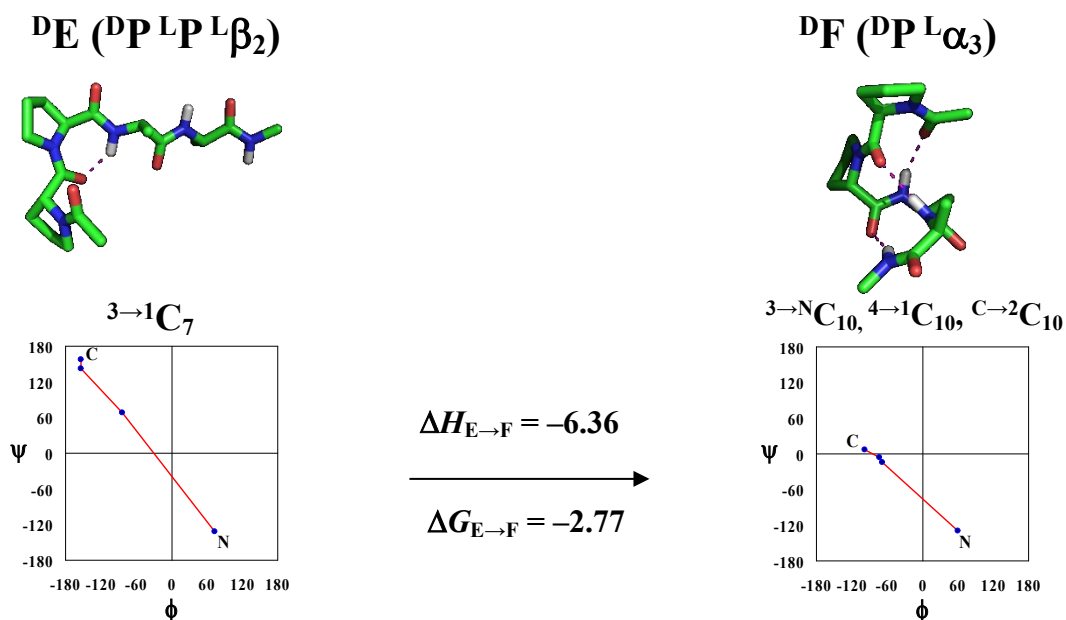

**Fig. S4.** Enthalpy change ( $\Delta H_{E \rightarrow F}$ ,  $\Delta H_M$ ) and free energy change ( $\Delta G_{E \rightarrow F}$ ,  $\Delta G_M$ ) (kcal/mol) in folding (subscript E→F) of end-protected diproline (**IIIa**, **IIIb**) peptides from <sup>L/D</sup>E to <sup>L/D</sup>F structures and their mutation of the folds (subscript M) from <sup>L</sup>E/<sup>L</sup>F to <sup>D</sup>E/<sup>D</sup>F structures in vacuum, showing the accompanying changes in  $\phi$ ,  $\psi$ 's and hydrogen bonds.

**Ia****<sup>L</sup>E (<sup>L</sup>β<sub>4</sub>)**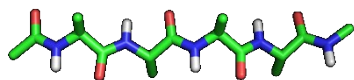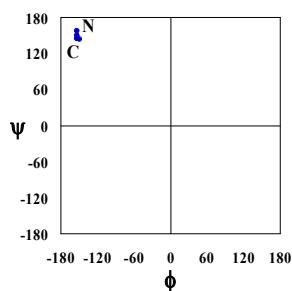

$$\Delta H_{E \rightarrow F} = -2.77$$

$$\Delta G_{E \rightarrow F} = -1.93$$

**<sup>L</sup>F (<sup>L</sup>α<sub>4</sub>)**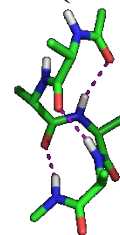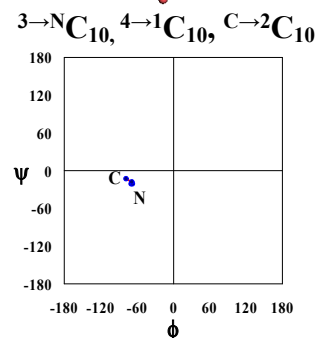

$$\Delta H_M = -0.05$$

$$\Delta G_M = 0.06$$

$$\Delta H_M = -0.22$$

$$\Delta G_M = -0.27$$

**Ib****<sup>D</sup>E (<sup>D</sup>β<sup>L</sup>β<sub>3</sub>)**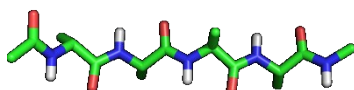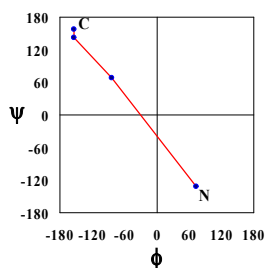

$$\Delta H_{E \rightarrow F} = -2.94$$

$$\Delta G_{E \rightarrow F} = -2.25$$

**<sup>D</sup>F (<sup>DP</sup>Lα<sub>3</sub>)**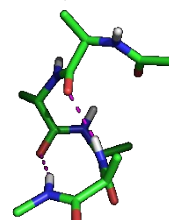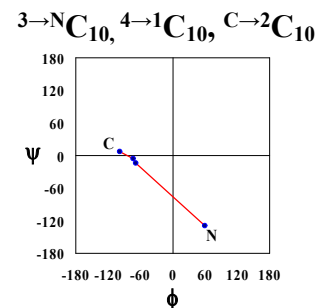

**Fig. S5.** Enthalpy change ( $\Delta H_{E \rightarrow F}$ ,  $\Delta H_M$ ) and free energy change ( $\Delta G_{E \rightarrow F}$ ,  $\Delta G_M$ ) (kcal/mol) in folding (subscript E→F) of end-protected tetraalanine (**Ia**, **Ib**) from <sup>L/D</sup>E to <sup>L/D</sup>F structures and their mutation of the folds (subscript M) from <sup>L</sup>E/<sup>L</sup>F to <sup>D</sup>E/<sup>D</sup>F structures in solvent, showing the accompanying changes in  $\phi$ ,  $\psi$ 's and hydrogen bonds.



**Ia****<sup>L</sup>S (<sup>L</sup>P<sub>4</sub>)**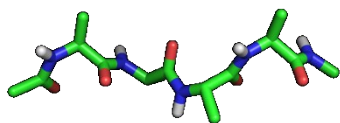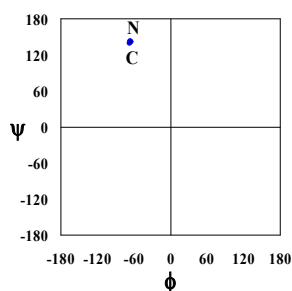

$$\Delta H_{S \rightarrow F} = -0.84$$

$$\Delta G_{S \rightarrow F} = 1.03$$

**<sup>L</sup>F (<sup>L</sup>α<sub>4</sub>)**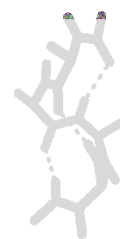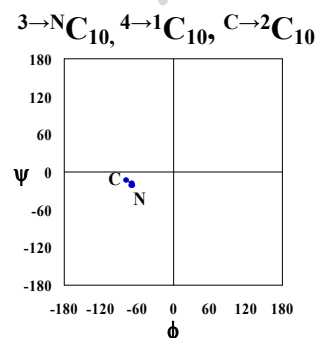

$$\Delta H_M = 0.40$$

$$\Delta G_M = 0.70$$

$$\Delta H_M = -0.22$$

$$\Delta G_M = -0.27$$

**Ib****<sup>D</sup>S (<sup>DP</sup>L<sub>P3</sub>)**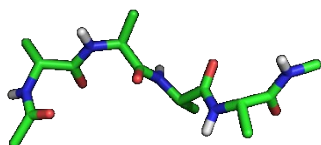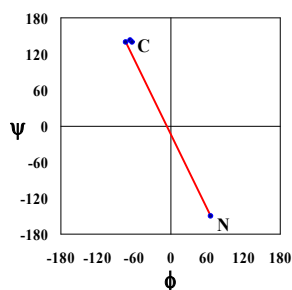

$$\Delta H_{S \rightarrow F} = -1.46$$

$$\Delta G_{S \rightarrow F} = 0.07$$

**<sup>D</sup>F (<sup>DP</sup>Lα<sub>3</sub>)**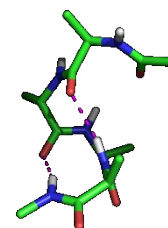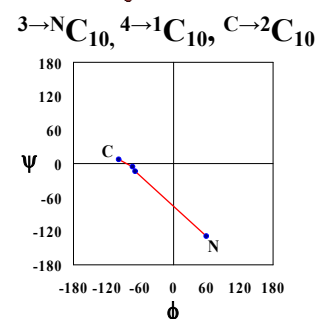

**Fig. S6.** Enthalpy change ( $\Delta H_{S \rightarrow F}$ ,  $\Delta H_M$ ) and free energy change ( $\Delta G_{S \rightarrow F}$ ,  $\Delta G_M$ ) (kcal/mol) in folding (subscript S→F) of end-protected tetraalanine (**Ia**, **Ib**) from <sup>L/D</sup>S to <sup>L/D</sup>F structures and their mutation of the folds (subscript M) from <sup>L</sup>S/<sup>L</sup>F to <sup>D</sup>S/<sup>D</sup>F structures in solvent, showing the accompanying changes in  $\phi$ ,  $\psi$ 's and hydrogen bonds.

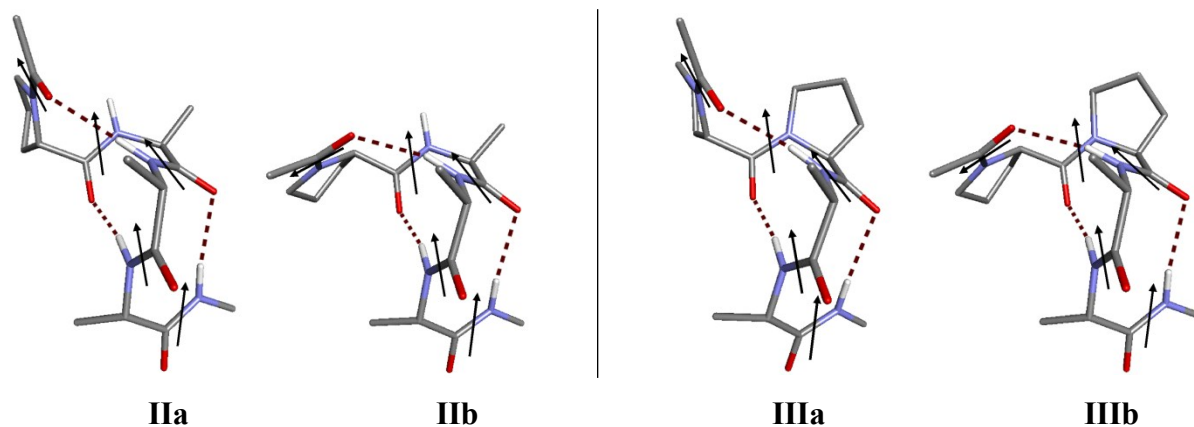

**Fig. S7.** The end-protected proline (**IIa**, **IIb**) and diproline (**IIIa**, **IIIb**) peptides as  $3_{10}$ -helix ( $^L\mathbf{F}$ ) and  $^D\mathbf{PPII}$ -capped- $3_{10}$ -helix ( $^D\mathbf{F}$ ) folds are identical in the donor-acceptor specificity of backbone hydrogen bonds, however, distinct in geometry of dipoles of backbone peptide units due to a  $\sim 90^\circ$  tilt in the dipole of a backbone peptide unit caused by the L- to D- stereochemical mutation of the N-terminal residue. The model peptides are shown in stick representation with hydrogen bonds between backbone CO and NH groups shown as dashed line in brown colour.

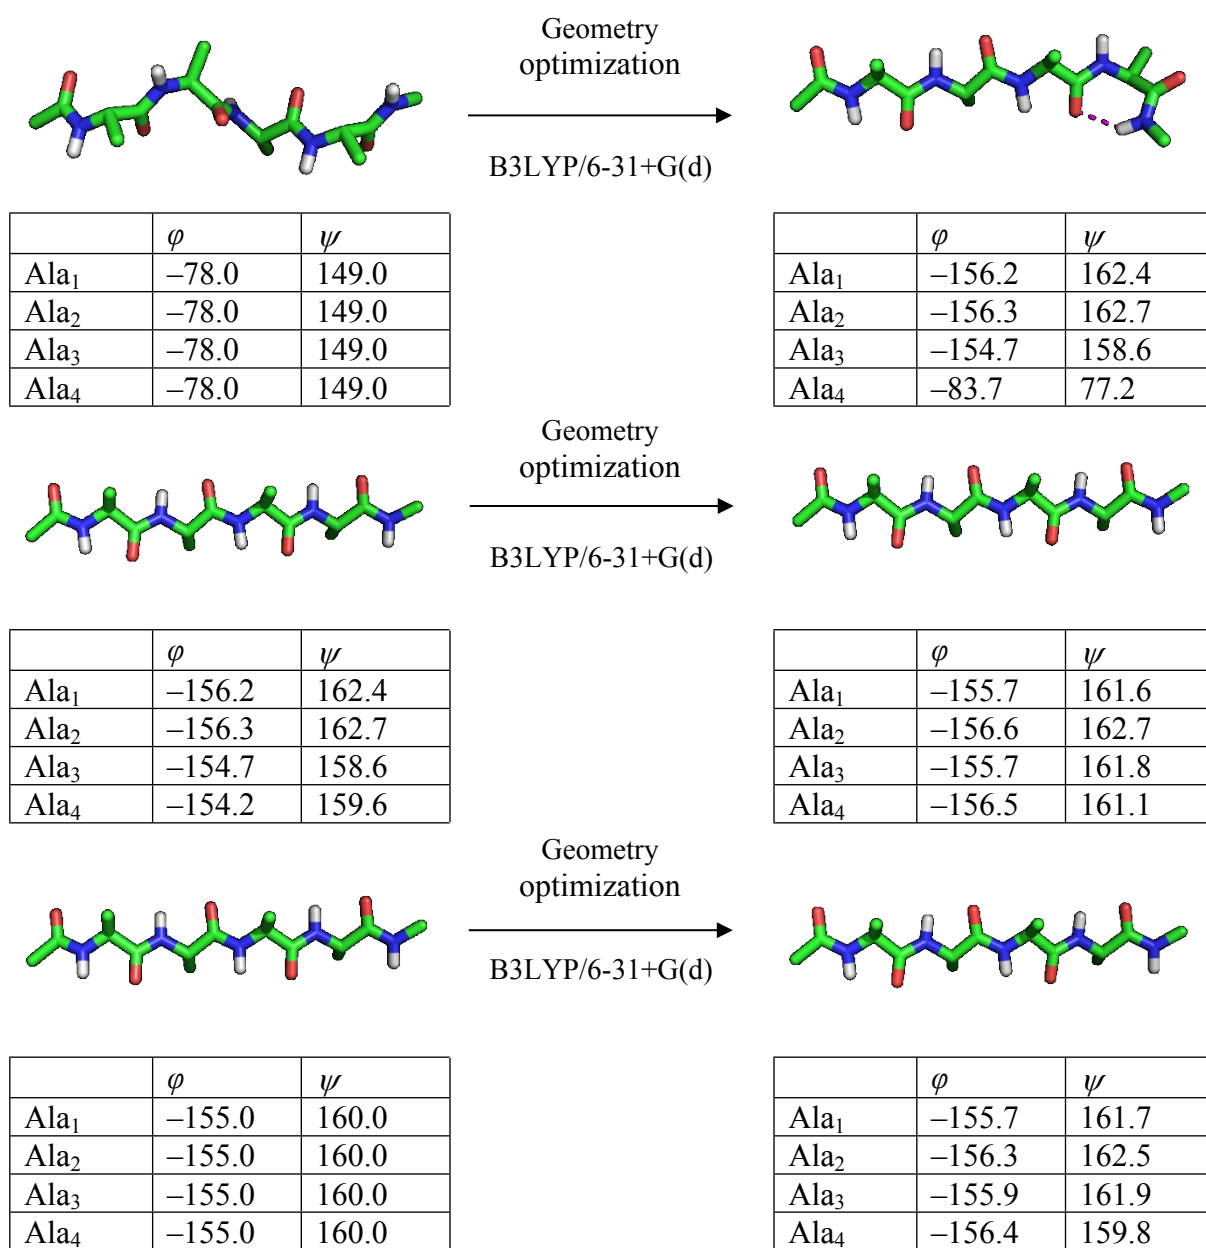

**Fig. S8.** Minimum energy conformers of end-protected tetraalanine (**1a**) achieved from different starting structures in correspondence of polyproline-II and extended  $\beta$ -conformation. All minima are extended  $\beta$ -structures with exception of one structure having a terminal residue locked in a hydrogen-bonded  $\gamma$ -turn structure.

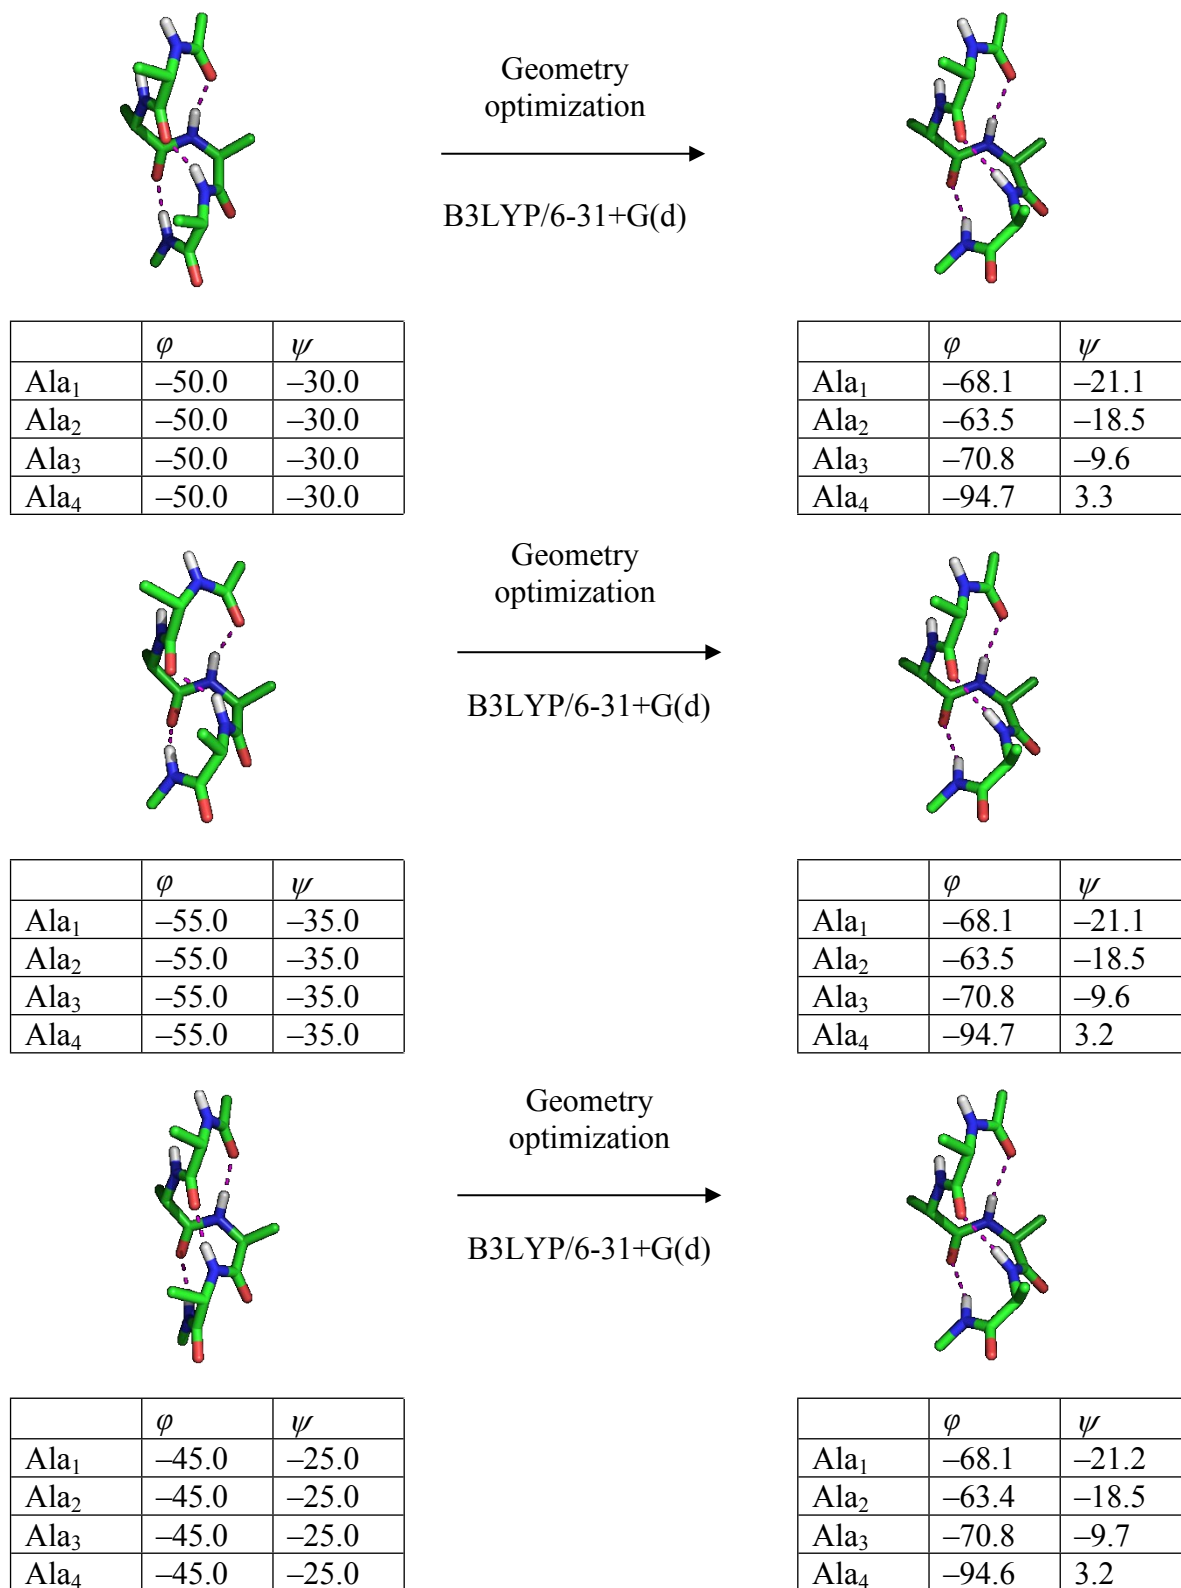

**Fig. S9.** Optimized geometry in end-protected tetraalanine (**Ia**) achieved in independent runs of optimization starting with  $3_{10}$ -helical folds varied by  $\pm 5^\circ$  in  $\varphi$ ,  $\psi$ 's. The optimized structures converge to similar conformation irrespective of the starting conformation.

**Table S1.** Specific dihedral angles for **E** and **F** folds of end-protected tetraalanine (**Ia**, **Ib**), proline (**IIa**, **IIb**) and diproline (**IIIa**, **IIIb**) peptides in correspondence of the optimized structures obtained in vacuum.

| Residue |             | <b>Ia</b>             |                       | <b>Ib</b>             |                       | <b>IIa</b>            |                       | <b>IIb</b>            |                       | <b>IIIa</b>           |                       | <b>IIIb</b>           |                       |
|---------|-------------|-----------------------|-----------------------|-----------------------|-----------------------|-----------------------|-----------------------|-----------------------|-----------------------|-----------------------|-----------------------|-----------------------|-----------------------|
|         |             | <sup>L</sup> <b>E</b> | <sup>L</sup> <b>F</b> | <sup>D</sup> <b>E</b> | <sup>D</sup> <b>F</b> | <sup>L</sup> <b>E</b> | <sup>L</sup> <b>F</b> | <sup>D</sup> <b>E</b> | <sup>D</sup> <b>F</b> | <sup>L</sup> <b>E</b> | <sup>L</sup> <b>F</b> | <sup>D</sup> <b>E</b> | <sup>D</sup> <b>F</b> |
| 1       | $\varphi$ 1 | -155.7                | -68.1                 | 155.9                 | 58.6                  | -85.3                 | -72.4                 | 82.8                  | 61.9                  | -72.9                 | -58.2                 | 73.1                  | 60.3                  |
|         | $\psi$ 1    | 161.7                 | -21.1                 | -162.0                | -128.7                | 76.4                  | -12.4                 | -68.2                 | -130.2                | 129.6                 | -33.6                 | -131.8                | -129.6                |
|         | $\omega$ 1  | 174.7                 | 177.7                 | -179.9                | -178.7                | -178.5                | 172.7                 | 170.1                 | -179.3                | -173.8                | -179.5                | -171.7                | -176.5                |
| 2       | $\varphi$ 2 | -156.3                | -63.5                 | -156.9                | -64.4                 | -149.7                | -63.1                 | -69.3                 | -64.1                 | -88.4                 | -69.0                 | -83.4                 | -68.6                 |
|         | $\psi$ 2    | 162.5                 | -18.5                 | 160.8                 | -20.1                 | 146.7                 | -18.5                 | 147.5                 | -19.6                 | 72.5                  | -11.6                 | 68.1                  | -14.0                 |
|         | $\omega$ 2  | 174.7                 | 178.1                 | -179.9                | 178.9                 | -178.5                | 178.3                 | 170.1                 | 178.4                 | -173.8                | 175.1                 | -171.7                | 176.1                 |
| 3       | $\varphi$ 3 | -155.9                | -70.8                 | -157.4                | -74.7                 | -155.0                | -70.2                 | -157.8                | -74.3                 | -153.2                | -71.6                 | -153.3                | -72.9                 |
|         | $\psi$ 3    | 161.9                 | -9.6                  | 163.5                 | -4.4                  | 161.6                 | -10.2                 | 159.3                 | -5.1                  | 143.4                 | -7.8                  | 142.9                 | -6.2                  |
|         | $\omega$ 3  | 174.6                 | 173.9                 | 174.8                 | 171.0                 | 173.4                 | 174.2                 | 176.1                 | 171.5                 | -178.7                | 173.6                 | -177.0                | 171.5                 |
| 4       | $\varphi$ 4 | -156.4                | -94.7                 | -155.2                | -96.9                 | -155.0                | -94.5                 | -156.1                | -99.2                 | -154.4                | -101.6                | -153.8                | -98.6                 |
|         | $\psi$ 4    | 159.8                 | 3.3                   | 160.1                 | 4.0                   | 159.6                 | 2.5                   | 160.0                 | 6.8                   | 158.2                 | 9.1                   | 157.3                 | 6.5                   |
|         | $\omega$ 4  | 175.2                 | 177.0                 | 174.8                 | 177.3                 | 174.8                 | 176.9                 | 174.5                 | 177.2                 | 174.3                 | 176.8                 | 174.3                 | 176.9                 |

**Table S2.** Specific dihedral angles for **E**, **S** and **F** folds of end-protected tetraalanine (**Ia**, **Ib**) in correspondence of the optimized structures obtained in presence of solvent.

| Residue |             | <b>Ia</b>             |                       |                       | <b>Ib</b>             |                       |                       |
|---------|-------------|-----------------------|-----------------------|-----------------------|-----------------------|-----------------------|-----------------------|
|         |             | <sup>L</sup> <b>E</b> | <sup>L</sup> <b>S</b> | <sup>L</sup> <b>F</b> | <sup>D</sup> <b>E</b> | <sup>D</sup> <b>S</b> | <sup>D</sup> <b>F</b> |
| 1       | $\varphi 1$ | -154.0                | -66.1                 | -68.7                 | 151.9                 | 65.5                  | 66.4                  |
|         | $\psi 1$    | 150.5                 | 141.1                 | -21.1                 | -152.5                | -149.7                | -142.8                |
|         | $\omega 1$  | 175.1                 | 176.9                 | -179.9                | -173.6                | -173.0                | -171.9                |
| 2       | $\varphi 2$ | -153.1                | -66.9                 | -66.6                 | -158.1                | -73.7                 | -71.5                 |
|         | $\psi 2$    | 157.2                 | 139.5                 | -20.9                 | 143.5                 | 139.1                 | -20.9                 |
|         | $\omega 2$  | 175.1                 | 176.9                 | -179.9                | -173.6                | -173.0                | -171.9                |
| 3       | $\varphi 3$ | -149.2                | -65.8                 | -68.1                 | -154.5                | -66.4                 | -69.8                 |
|         | $\psi 3$    | 143.4                 | 142.3                 | -18.4                 | 152.1                 | 142.8                 | -19.7                 |
|         | $\omega 3$  | 176.9                 | 174.9                 | 179.9                 | 177.3                 | 173.5                 | 179.7                 |
| 4       | $\varphi 4$ | -154.0                | -65.3                 | -77.7                 | -153.0                | -62.6                 | -81.8                 |
|         | $\psi 4$    | 145.1                 | 141.4                 | -13.6                 | 146.8                 | 139.4                 | -11.5                 |
|         | $\omega 4$  | 178.6                 | 177.2                 | 175.6                 | 176.6                 | 175.4                 | 177.1                 |

**Table S3.** Thermodynamic parameters for **E**, **S** and **F** folds of end-protected tetraalanine (**Ia**, **Ib**), proline (**IIa**, **IIb**) and diproline (**IIIa**, **IIIb**) peptides in correspondence of the optimized structures obtained in vacuum and in presence of solvent.

| Peptide     | Medium                        | Basis Set | E / Hartrees | U / Hartrees | H / Hartrees | G / Hartrees |
|-------------|-------------------------------|-----------|--------------|--------------|--------------|--------------|
| <b>Ia</b>   | <sup>L</sup> <b>E</b> vacuum  | 6-31+G(d) | -1237.456419 | -1237.426463 | -1237.425518 | -1237.524427 |
|             | <sup>L</sup> <b>F</b> vacuum  | 6-31+G(d) | -1237.456889 | -1237.427780 | -1237.426836 | -1237.518764 |
| <b>Ib</b>   | <sup>D</sup> <b>E</b> vacuum  | 6-31+G(d) | -1237.456533 | -1237.426540 | -1237.425595 | -1237.524646 |
|             | <sup>D</sup> <b>F</b> vacuum  | 6-31+G(d) | -1237.458335 | -1237.429174 | -1237.428230 | -1237.520312 |
| <b>Ia</b>   | <sup>L</sup> <b>E</b> solvent | 6-31+G(d) | -1237.509116 | -1237.479926 | -1237.478982 | -1237.572094 |
|             | <sup>L</sup> <b>S</b> solvent | 6-31+G(d) | -1237.512512 | -1237.482991 | -1237.482047 | -1237.576812 |
|             | <sup>L</sup> <b>F</b> solvent | 6-31+G(d) | -1237.513192 | -1237.484335 | -1237.483390 | -1237.575167 |
|             | <sup>D</sup> <b>E</b> solvent | 6-31+G(d) | -1237.509217 | -1237.479999 | -1237.479055 | -1237.572006 |
| <b>Ib</b>   | <sup>D</sup> <b>S</b> solvent | 6-31+G(d) | -1237.511133 | -1237.482358 | -1237.481413 | -1237.575698 |
|             | <sup>D</sup> <b>F</b> solvent | 6-31+G(d) | -1237.513680 | -1237.484677 | -1237.483733 | -1237.575590 |
| <b>IIa</b>  | <sup>L</sup> <b>E</b> vacuum  | 6-31+G(d) | -1314.831978 | -1314.803124 | -1314.802180 | -1314.895857 |
|             | <sup>L</sup> <b>F</b> vacuum  | 6-31+G(d) | -1314.835552 | -1314.805698 | -1314.804754 | -1314.898257 |
| <b>IIb</b>  | <sup>D</sup> <b>E</b> vacuum  | 6-31+G(d) | -1314.832912 | -1314.803346 | -1314.802402 | -1314.898297 |
|             | <sup>D</sup> <b>F</b> vacuum  | 6-31+G(d) | -1314.837772 | -1314.807992 | -1314.807048 | -1314.900155 |
| <b>IIIa</b> | <sup>L</sup> <b>E</b> vacuum  | 6-31+G(d) | -1392.207330 | -1392.176832 | -1392.175888 | -1392.274977 |
|             | <sup>L</sup> <b>F</b> vacuum  | 6-31+G(d) | -1392.205737 | -1392.174935 | -1392.173990 | -1392.270064 |
| <b>IIIb</b> | <sup>D</sup> <b>E</b> vacuum  | 6-31+G(d) | -1392.206168 | -1392.174740 | -1392.173796 | -1392.274775 |
|             | <sup>D</sup> <b>F</b> vacuum  | 6-31+G(d) | -1392.215440 | -1392.184871 | -1392.183926 | -1392.279195 |

Cartesian coordinates of the optimized geometries of end-protected tetraalanine (**Ia**, **Ib**), proline (**IIa**, **IIb**) and diproline (**IIIa**, **IIIb**) peptides in fully-extended (<sup>L</sup>E and <sup>D</sup>E), fully-folded structures (<sup>L</sup>F and <sup>D</sup>F) and <sup>D</sup>PPH-capped-3<sub>10</sub>-helix folds in vacuum.

**Ia (<sup>L</sup>E: <sup>L</sup>β<sub>4</sub>)**

|    |   |   |           |           |           |
|----|---|---|-----------|-----------|-----------|
| 1  | 6 | 0 | -8.839097 | 0.778152  | -0.034685 |
| 2  | 6 | 0 | -7.669262 | -0.112475 | 0.352778  |
| 3  | 8 | 0 | -7.794182 | -1.030303 | 1.164982  |
| 4  | 7 | 0 | -6.483878 | 0.166432  | -0.256868 |
| 5  | 1 | 0 | -6.377112 | 0.967384  | -0.870372 |
| 6  | 6 | 0 | -5.258777 | -0.553230 | 0.045803  |
| 7  | 6 | 0 | -5.167893 | -1.888468 | -0.721182 |
| 8  | 6 | 0 | -4.088037 | 0.374409  | -0.317835 |
| 9  | 8 | 0 | -4.236679 | 1.329341  | -1.087080 |
| 10 | 7 | 0 | -2.896745 | 0.053641  | 0.236846  |
| 11 | 1 | 0 | -2.790975 | -0.760180 | 0.836241  |
| 12 | 6 | 0 | -1.660235 | 0.749739  | -0.083373 |
| 13 | 6 | 0 | -1.515362 | 2.063979  | 0.710082  |
| 14 | 6 | 0 | -0.509655 | -0.221201 | 0.233156  |
| 15 | 8 | 0 | -0.678208 | -1.194480 | 0.974010  |
| 16 | 7 | 0 | 0.681333  | 0.083719  | -0.328696 |
| 17 | 1 | 0 | 0.802439  | 0.913417  | -0.903040 |
| 18 | 6 | 0 | 1.903270  | -0.655733 | -0.048442 |
| 19 | 6 | 0 | 2.006535  | -1.941736 | -0.892585 |
| 20 | 6 | 0 | 3.073022  | 0.298934  | -0.342099 |
| 21 | 8 | 0 | 2.921316  | 1.297098  | -1.053633 |
| 22 | 7 | 0 | 4.260297  | -0.046366 | 0.202916  |
| 23 | 1 | 0 | 4.368129  | -0.888942 | 0.761220  |
| 24 | 6 | 0 | 5.491797  | 0.684468  | -0.055449 |
| 25 | 6 | 0 | 5.612856  | 1.938966  | 0.832971  |
| 26 | 6 | 0 | 6.649288  | -0.294792 | 0.208517  |
| 27 | 8 | 0 | 6.489184  | -1.288041 | 0.918942  |
| 28 | 7 | 0 | 7.832630  | 0.034016  | -0.368998 |
| 29 | 1 | 0 | 7.871893  | 0.866207  | -0.942681 |
| 30 | 6 | 0 | 9.061844  | -0.721859 | -0.164163 |
| 31 | 1 | 0 | 9.765165  | -0.171027 | 0.471731  |
| 32 | 1 | 0 | 9.538051  | -0.935249 | -1.126416 |
| 33 | 1 | 0 | 8.802572  | -1.661341 | 0.325614  |
| 34 | 1 | 0 | 6.528107  | 2.497977  | 0.606137  |
| 35 | 1 | 0 | 5.630306  | 1.658341  | 1.891528  |
| 36 | 1 | 0 | 4.756326  | 2.594094  | 0.651720  |
| 37 | 1 | 0 | 5.487265  | 0.992924  | -1.107780 |
| 38 | 1 | 0 | 2.913570  | -2.504633 | -0.645264 |
| 39 | 1 | 0 | 2.025893  | -1.698925 | -1.960678 |
| 40 | 1 | 0 | 1.140345  | -2.576977 | -0.687978 |
| 41 | 1 | 0 | 1.900659  | -0.928290 | 1.013524  |
| 42 | 1 | 0 | -0.598568 | 2.595379  | 0.430537  |



|    |   |   |           |           |           |
|----|---|---|-----------|-----------|-----------|
| 43 | 1 | 0 | -1.487424 | 1.861126  | 1.786327  |
| 44 | 1 | 0 | -2.369301 | 2.711366  | 0.492420  |
| 45 | 1 | 0 | -1.667359 | 0.982748  | -1.154837 |
| 46 | 1 | 0 | -4.262180 | -2.442445 | -0.448662 |
| 47 | 1 | 0 | -5.156631 | -1.709663 | -1.802193 |
| 48 | 1 | 0 | -6.036967 | -2.503216 | -0.470956 |
| 49 | 1 | 0 | -5.246472 | -0.765578 | 1.121695  |
| 50 | 1 | 0 | -9.222123 | 1.268570  | 0.866291  |
| 51 | 1 | 0 | -9.642886 | 0.151030  | -0.433790 |
| 52 | 1 | 0 | -8.581378 | 1.541984  | -0.775461 |

**Ia (<sup>L</sup>F: <sup>L</sup> $\alpha_4$ )**

|    |   |   |           |           |           |
|----|---|---|-----------|-----------|-----------|
| 1  | 6 | 0 | 5.389262  | 1.201086  | -0.808989 |
| 2  | 6 | 0 | 4.040430  | 0.509135  | -0.823485 |
| 3  | 8 | 0 | 2.991229  | 1.123656  | -1.017460 |
| 4  | 7 | 0 | 4.040387  | -0.843416 | -0.594325 |
| 5  | 1 | 0 | 4.934023  | -1.317581 | -0.546929 |
| 6  | 6 | 0 | 2.857633  | -1.669432 | -0.861278 |
| 7  | 6 | 0 | 3.232913  | -3.155448 | -0.812911 |
| 8  | 6 | 0 | 1.676755  | -1.385457 | 0.082717  |
| 9  | 8 | 0 | 0.538299  | -1.709937 | -0.255693 |
| 10 | 7 | 0 | 1.950615  | -0.788453 | 1.269363  |
| 11 | 1 | 0 | 2.903900  | -0.504526 | 1.455430  |
| 12 | 6 | 0 | 0.901289  | -0.428469 | 2.219258  |
| 13 | 6 | 0 | 1.521576  | 0.033404  | 3.542468  |
| 14 | 6 | 0 | -0.089664 | 0.628717  | 1.687028  |
| 15 | 8 | 0 | -1.183528 | 0.746237  | 2.247189  |
| 16 | 7 | 0 | 0.287504  | 1.381443  | 0.626660  |
| 17 | 1 | 0 | 1.184674  | 1.217359  | 0.175365  |
| 18 | 6 | 0 | -0.606015 | 2.377274  | 0.033927  |
| 19 | 6 | 0 | 0.186572  | 3.341174  | -0.855793 |
| 20 | 6 | 0 | -1.803314 | 1.780016  | -0.741791 |
| 21 | 8 | 0 | -2.704148 | 2.534580  | -1.104449 |
| 22 | 7 | 0 | -1.800640 | 0.439494  | -0.968968 |
| 23 | 1 | 0 | -1.007004 | -0.120877 | -0.671579 |
| 24 | 6 | 0 | -2.930525 | -0.259135 | -1.573775 |
| 25 | 6 | 0 | -2.445603 | -1.330140 | -2.558474 |
| 26 | 6 | 0 | -3.905649 | -0.874924 | -0.541888 |
| 27 | 8 | 0 | -4.870980 | -1.534572 | -0.933802 |
| 28 | 7 | 0 | -3.653853 | -0.649138 | 0.768695  |
| 29 | 1 | 0 | -2.869765 | -0.069555 | 1.047266  |
| 30 | 6 | 0 | -4.555130 | -1.134527 | 1.801704  |
| 31 | 1 | 0 | -4.124687 | -0.890958 | 2.775706  |
| 32 | 1 | 0 | -4.685684 | -2.218645 | 1.719732  |
| 33 | 1 | 0 | -5.543752 | -0.668441 | 1.714365  |
| 34 | 1 | 0 | -3.305914 | -1.867232 | -2.964876 |
| 35 | 1 | 0 | -1.787478 | -2.052560 | -2.061170 |
| 36 | 1 | 0 | -1.890566 | -0.863094 | -3.379444 |
| 37 | 1 | 0 | -3.512903 | 0.497091  | -2.109431 |

|    |   |   |           |           |           |
|----|---|---|-----------|-----------|-----------|
| 38 | 1 | 0 | -0.500768 | 4.066427  | -1.297895 |
| 39 | 1 | 0 | 0.701918  | 2.808424  | -1.662869 |
| 40 | 1 | 0 | 0.937188  | 3.877746  | -0.265223 |
| 41 | 1 | 0 | -1.069957 | 2.936355  | 0.853063  |
| 42 | 1 | 0 | 0.726125  | 0.295040  | 4.244655  |
| 43 | 1 | 0 | 2.155087  | 0.918199  | 3.400350  |
| 44 | 1 | 0 | 2.126294  | -0.766742 | 3.984177  |
| 45 | 1 | 0 | 0.284689  | -1.315179 | 2.397748  |
| 46 | 1 | 0 | 2.345433  | -3.761988 | -1.010205 |
| 47 | 1 | 0 | 3.629823  | -3.435572 | 0.170374  |
| 48 | 1 | 0 | 3.983404  | -3.389200 | -1.577083 |
| 49 | 1 | 0 | 2.473688  | -1.422674 | -1.857624 |
| 50 | 1 | 0 | 6.200444  | 0.570459  | -0.431525 |
| 51 | 1 | 0 | 5.320315  | 2.106649  | -0.199756 |
| 52 | 1 | 0 | 5.633217  | 1.512226  | -1.831187 |

**Ib (<sup>D</sup>E: <sup>D</sup> $\beta$  <sup>L</sup> $\beta_3$ )**

|    |   |   |           |           |           |
|----|---|---|-----------|-----------|-----------|
| 1  | 6 | 0 | -8.409812 | -0.815951 | -1.615721 |
| 2  | 6 | 0 | -7.405021 | -0.963314 | -0.484131 |
| 3  | 8 | 0 | -7.515485 | -1.843432 | 0.370731  |
| 4  | 7 | 0 | -6.385846 | -0.059898 | -0.474430 |
| 5  | 6 | 0 | -5.310454 | -0.102732 | 0.501335  |
| 6  | 6 | 0 | -5.712084 | 0.559849  | 1.834846  |
| 7  | 6 | 0 | -4.101627 | 0.608409  | -0.129038 |
| 8  | 8 | 0 | -4.233792 | 1.378944  | -1.085364 |
| 9  | 7 | 0 | -2.907291 | 0.356237  | 0.454021  |
| 10 | 6 | 0 | -1.659498 | 0.940930  | -0.012985 |
| 11 | 6 | 0 | -1.458785 | 2.375863  | 0.514103  |
| 12 | 6 | 0 | -0.530366 | 0.011954  | 0.464058  |
| 13 | 8 | 0 | -0.701783 | -0.775218 | 1.399734  |
| 14 | 7 | 0 | 0.646120  | 0.141780  | -0.188249 |
| 15 | 6 | 0 | 1.852916  | -0.572072 | 0.202048  |
| 16 | 6 | 0 | 1.863376  | -2.021552 | -0.323635 |
| 17 | 6 | 0 | 3.039453  | 0.233628  | -0.354398 |
| 18 | 8 | 0 | 2.881922  | 1.071905  | -1.247747 |
| 19 | 7 | 0 | 4.246192  | -0.058345 | 0.179327  |
| 20 | 6 | 0 | 5.486782  | 0.526113  | -0.306565 |
| 21 | 6 | 0 | 5.741511  | 1.920281  | 0.300703  |
| 22 | 6 | 0 | 6.612885  | -0.455762 | 0.063869  |
| 23 | 8 | 0 | 6.460292  | -1.287161 | 0.959631  |
| 24 | 7 | 0 | 7.763417  | -0.314020 | -0.641942 |
| 25 | 6 | 0 | 8.966814  | -1.092264 | -0.377188 |
| 26 | 1 | 0 | -6.263581 | 0.611186  | -1.225555 |
| 27 | 1 | 0 | -2.809649 | -0.341139 | 1.186812  |
| 28 | 1 | 0 | 0.771783  | 0.824763  | -0.930452 |
| 29 | 1 | 0 | 4.357961  | -0.782467 | 0.883900  |
| 30 | 1 | 0 | 7.800025  | 0.395091  | -1.362353 |
| 31 | 1 | 0 | 9.734835  | -0.482196 | 0.113270  |
| 32 | 1 | 0 | 9.368929  | -1.493082 | -1.312965 |

|    |   |   |           |           |           |
|----|---|---|-----------|-----------|-----------|
| 33 | 1 | 0 | 8.696795  | -1.918314 | 0.281991  |
| 34 | 1 | 0 | 6.658682  | 2.365989  | -0.101378 |
| 35 | 1 | 0 | 5.836381  | 1.852503  | 1.389742  |
| 36 | 1 | 0 | 4.903731  | 2.579215  | 0.056287  |
| 37 | 1 | 0 | 5.410402  | 0.621640  | -1.396355 |
| 38 | 1 | 0 | 2.759980  | -2.555857 | 0.009948  |
| 39 | 1 | 0 | 1.836598  | -2.033399 | -1.418772 |
| 40 | 1 | 0 | 0.985884  | -2.549649 | 0.059282  |
| 41 | 1 | 0 | 1.898807  | -0.593349 | 1.297493  |
| 42 | 1 | 0 | -0.533807 | 2.813814  | 0.122259  |
| 43 | 1 | 0 | -1.411366 | 2.379420  | 1.608594  |
| 44 | 1 | 0 | -2.297959 | 2.999104  | 0.192457  |
| 45 | 1 | 0 | -1.685142 | 0.967016  | -1.108801 |
| 46 | 1 | 0 | -4.905998 | 0.482318  | 2.573305  |
| 47 | 1 | 0 | -6.596143 | 0.054094  | 2.233009  |
| 48 | 1 | 0 | -5.945823 | 1.619435  | 1.681907  |
| 49 | 1 | 0 | -5.067235 | -1.154960 | 0.693268  |
| 50 | 1 | 0 | -9.404677 | -0.659423 | -1.186158 |
| 51 | 1 | 0 | -8.440998 | -1.751815 | -2.183195 |
| 52 | 1 | 0 | -8.182323 | 0.009192  | -2.298323 |

**Ib (DP: DP<sup>L</sup> $\alpha_3$ )**

|    |   |   |           |           |           |
|----|---|---|-----------|-----------|-----------|
| 1  | 6 | 0 | -2.821496 | -3.174004 | 0.841418  |
| 2  | 6 | 0 | -2.960405 | -1.715181 | 0.461787  |
| 3  | 8 | 0 | -2.786149 | -0.804308 | 1.280085  |
| 4  | 7 | 0 | -3.292324 | -1.442536 | -0.829831 |
| 5  | 1 | 0 | -3.272305 | -2.188916 | -1.512327 |
| 6  | 6 | 0 | -3.372912 | -0.069667 | -1.314895 |
| 7  | 6 | 0 | -3.766076 | -0.060236 | -2.795566 |
| 8  | 6 | 0 | -2.017059 | 0.639344  | -1.119919 |
| 9  | 8 | 0 | -0.970485 | 0.148285  | -1.542205 |
| 10 | 7 | 0 | -2.062662 | 1.839348  | -0.483809 |
| 11 | 1 | 0 | -2.924643 | 2.114421  | -0.029751 |
| 12 | 6 | 0 | -0.866245 | 2.644444  | -0.249522 |
| 13 | 6 | 0 | -1.258546 | 4.031542  | 0.272551  |
| 14 | 6 | 0 | 0.167664  | 1.989353  | 0.689238  |
| 15 | 8 | 0 | 1.332506  | 2.398526  | 0.661697  |
| 16 | 7 | 0 | -0.253045 | 1.000299  | 1.513070  |
| 17 | 1 | 0 | -1.198379 | 0.631335  | 1.431994  |
| 18 | 6 | 0 | 0.669721  | 0.312466  | 2.416048  |
| 19 | 6 | 0 | -0.096374 | -0.352515 | 3.564377  |
| 20 | 6 | 0 | 1.614122  | -0.694960 | 1.718966  |
| 21 | 8 | 0 | 2.496800  | -1.235454 | 2.383023  |
| 22 | 7 | 0 | 1.435467  | -0.904761 | 0.386062  |
| 23 | 1 | 0 | 0.665345  | -0.450435 | -0.096085 |
| 24 | 6 | 0 | 2.373861  | -1.677943 | -0.421420 |
| 25 | 6 | 0 | 1.632209  | -2.604216 | -1.392771 |
| 26 | 6 | 0 | 3.400424  | -0.806379 | -1.184336 |
| 27 | 8 | 0 | 4.203454  | -1.343246 | -1.950736 |

|    |   |   |           |           |           |
|----|---|---|-----------|-----------|-----------|
| 28 | 7 | 0 | 3.375574  | 0.528562  | -0.963641 |
| 29 | 1 | 0 | 2.720222  | 0.928415  | -0.301094 |
| 30 | 6 | 0 | 4.342531  | 1.413216  | -1.595146 |
| 31 | 1 | 0 | 4.087095  | 2.442739  | -1.334593 |
| 32 | 1 | 0 | 4.318402  | 1.293568  | -2.683193 |
| 33 | 1 | 0 | 5.361076  | 1.193627  | -1.254005 |
| 34 | 1 | 0 | 2.356202  | -3.136651 | -2.014191 |
| 35 | 1 | 0 | 0.964505  | -2.032599 | -2.048528 |
| 36 | 1 | 0 | 1.033498  | -3.332333 | -0.833926 |
| 37 | 1 | 0 | 2.962290  | -2.276771 | 0.280653  |
| 38 | 1 | 0 | 0.610369  | -0.886746 | 4.203770  |
| 39 | 1 | 0 | -0.842029 | -1.061535 | 3.188656  |
| 40 | 1 | 0 | -0.615051 | 0.404330  | 4.162905  |
| 41 | 1 | 0 | 1.346680  | 1.069966  | 2.824761  |
| 42 | 1 | 0 | -0.357191 | 4.627227  | 0.436753  |
| 43 | 1 | 0 | -1.798967 | 3.960842  | 1.225002  |
| 44 | 1 | 0 | -1.892135 | 4.550847  | -0.455095 |
| 45 | 1 | 0 | -0.341487 | 2.750177  | -1.204110 |
| 46 | 1 | 0 | -3.874240 | 0.968067  | -3.154557 |
| 47 | 1 | 0 | -4.722866 | -0.574048 | -2.940499 |
| 48 | 1 | 0 | -2.996085 | -0.550146 | -3.401332 |
| 49 | 1 | 0 | -4.139864 | 0.447201  | -0.725122 |
| 50 | 1 | 0 | -3.111862 | -3.861563 | 0.041253  |
| 51 | 1 | 0 | -3.437843 | -3.369627 | 1.724051  |
| 52 | 1 | 0 | -1.779329 | -3.369794 | 1.115879  |

**IIa (<sup>L</sup>E: <sup>L</sup>P<sup>L</sup>β<sub>3</sub>)**

|    |   |   |           |           |           |
|----|---|---|-----------|-----------|-----------|
| 1  | 6 | 0 | 6.340787  | 2.515227  | 1.135160  |
| 2  | 6 | 0 | 5.396616  | 1.727305  | 0.243768  |
| 3  | 8 | 0 | 4.378706  | 2.241464  | -0.234524 |
| 4  | 7 | 0 | 5.720505  | 0.424887  | 0.000513  |
| 5  | 6 | 0 | 4.950863  | -0.379240 | -0.975676 |
| 6  | 6 | 0 | 5.963843  | -1.438719 | -1.431144 |
| 7  | 6 | 0 | 6.853886  | -1.648493 | -0.194109 |
| 8  | 6 | 0 | 6.971026  | -0.241324 | 0.412728  |
| 9  | 6 | 0 | 3.694522  | -1.010036 | -0.321670 |
| 10 | 8 | 0 | 3.648576  | -2.207367 | -0.025411 |
| 11 | 7 | 0 | 2.666926  | -0.150889 | -0.122974 |
| 12 | 1 | 0 | 2.800078  | 0.843256  | -0.313471 |
| 13 | 6 | 0 | 1.426173  | -0.573192 | 0.509399  |
| 14 | 6 | 0 | 1.480619  | -0.430244 | 2.044063  |
| 15 | 6 | 0 | 0.281493  | 0.274807  | -0.061766 |
| 16 | 8 | 0 | 0.440183  | 1.458591  | -0.359302 |
| 17 | 7 | 0 | -0.912815 | -0.362075 | -0.169522 |
| 18 | 1 | 0 | -1.027463 | -1.330078 | 0.114713  |
| 19 | 6 | 0 | -2.134361 | 0.324694  | -0.556572 |
| 20 | 6 | 0 | -2.256884 | 0.467279  | -2.087500 |
| 21 | 6 | 0 | -3.307557 | -0.482656 | 0.020881  |
| 22 | 8 | 0 | -3.174784 | -1.664109 | 0.354340  |

|    |   |   |            |           |           |
|----|---|---|------------|-----------|-----------|
| 23 | 7 | 0 | -4.485340  | 0.178065  | 0.107382  |
| 24 | 1 | 0 | -4.580849  | 1.141411  | -0.201046 |
| 25 | 6 | 0 | -5.720171  | -0.467180 | 0.524603  |
| 26 | 6 | 0 | -5.841556  | -0.540026 | 2.060244  |
| 27 | 6 | 0 | -6.876532  | 0.344880  | -0.083750 |
| 28 | 8 | 0 | -6.719810  | 1.518456  | -0.421667 |
| 29 | 7 | 0 | -8.060675  | -0.313544 | -0.177942 |
| 30 | 1 | 0 | -8.088265  | -1.289435 | 0.086405  |
| 31 | 6 | 0 | -9.285689  | 0.304420  | -0.667835 |
| 32 | 1 | 0 | -10.083204 | 0.225933  | 0.079254  |
| 33 | 1 | 0 | -9.617556  | -0.169087 | -1.598881 |
| 34 | 1 | 0 | -9.075608  | 1.357294  | -0.860092 |
| 35 | 1 | 0 | -6.758077  | -1.060942 | 2.360641  |
| 36 | 1 | 0 | -5.856191  | 0.466579  | 2.491708  |
| 37 | 1 | 0 | -4.985522  | -1.088048 | 2.463550  |
| 38 | 1 | 0 | -5.718163  | -1.486891 | 0.121204  |
| 39 | 1 | 0 | -3.163029  | 1.018841  | -2.362794 |
| 40 | 1 | 0 | -2.288870  | -0.518978 | -2.563594 |
| 41 | 1 | 0 | -1.389887  | 1.016182  | -2.465217 |
| 42 | 1 | 0 | -2.114685  | 1.326855  | -0.111794 |
| 43 | 1 | 0 | 0.548176   | -0.778759 | 2.503795  |
| 44 | 1 | 0 | 1.638980   | 0.616714  | 2.324086  |
| 45 | 1 | 0 | 2.305223   | -1.033789 | 2.435864  |
| 46 | 1 | 0 | 1.282049   | -1.628489 | 0.256959  |
| 47 | 1 | 0 | 7.066073   | -0.259725 | 1.503936  |
| 48 | 1 | 0 | 7.838938   | 0.296502  | 0.005521  |
| 49 | 1 | 0 | 7.834876   | -2.069693 | -0.436150 |
| 50 | 1 | 0 | 6.351199   | -2.323855 | 0.504719  |
| 51 | 1 | 0 | 6.551494   | -1.040286 | -2.267559 |
| 52 | 1 | 0 | 5.471084   | -2.358326 | -1.752331 |
| 53 | 1 | 0 | 4.629596   | 0.281508  | -1.787460 |
| 54 | 1 | 0 | 6.443936   | 2.046191  | 2.120853  |
| 55 | 1 | 0 | 5.936201   | 3.521089  | 1.256480  |
| 56 | 1 | 0 | 7.343812   | 2.581643  | 0.696080  |

### IIa ( ${}^L F: {}^L \alpha_4$ )

|    |   |   |          |           |           |
|----|---|---|----------|-----------|-----------|
| 1  | 6 | 0 | 4.941060 | 1.847096  | -0.708836 |
| 2  | 6 | 0 | 3.664230 | 1.030638  | -0.767533 |
| 3  | 8 | 0 | 2.567148 | 1.549911  | -1.004463 |
| 4  | 7 | 0 | 3.764013 | -0.311191 | -0.517776 |
| 5  | 6 | 0 | 2.620366 | -1.202403 | -0.794297 |
| 6  | 6 | 0 | 3.249398 | -2.616767 | -0.794506 |
| 7  | 6 | 0 | 4.513333 | -2.465701 | 0.068932  |
| 8  | 6 | 0 | 5.015123 | -1.060774 | -0.287231 |
| 9  | 6 | 0 | 1.441468 | -1.071371 | 0.180640  |
| 10 | 8 | 0 | 0.359712 | -1.585271 | -0.106723 |
| 11 | 7 | 0 | 1.641535 | -0.369740 | 1.325508  |
| 12 | 1 | 0 | 2.529504 | 0.100156  | 1.444442  |

|    |   |   |           |           |           |
|----|---|---|-----------|-----------|-----------|
| 13 | 6 | 0 | 0.548867  | -0.054653 | 2.241378  |
| 14 | 6 | 0 | 1.099152  | 0.564119  | 3.530798  |
| 15 | 6 | 0 | -0.539404 | 0.851340  | 1.625687  |
| 16 | 8 | 0 | -1.649200 | 0.892973  | 2.165172  |
| 17 | 7 | 0 | -0.228058 | 1.558360  | 0.513685  |
| 18 | 1 | 0 | 0.696602  | 1.479905  | 0.094708  |
| 19 | 6 | 0 | -1.212243 | 2.411461  | -0.154199 |
| 20 | 6 | 0 | -0.513086 | 3.369302  | -1.124750 |
| 21 | 6 | 0 | -2.342346 | 1.638454  | -0.874009 |
| 22 | 8 | 0 | -3.313586 | 2.268603  | -1.288364 |
| 23 | 7 | 0 | -2.203136 | 0.291842  | -1.001134 |
| 24 | 1 | 0 | -1.360552 | -0.160822 | -0.659521 |
| 25 | 6 | 0 | -3.253657 | -0.561263 | -1.548229 |
| 26 | 6 | 0 | -2.657695 | -1.649328 | -2.449785 |
| 27 | 6 | 0 | -4.168568 | -1.192996 | -0.471781 |
| 28 | 8 | 0 | -5.067448 | -1.964690 | -0.814113 |
| 29 | 7 | 0 | -3.940359 | -0.857903 | 0.819501  |
| 30 | 1 | 0 | -3.215754 | -0.188714 | 1.055733  |
| 31 | 6 | 0 | -4.794674 | -1.354319 | 1.886609  |
| 32 | 1 | 0 | -4.389522 | -1.008337 | 2.840267  |
| 33 | 1 | 0 | -4.825093 | -2.448850 | 1.877012  |
| 34 | 1 | 0 | -5.821751 | -0.987430 | 1.773589  |
| 35 | 1 | 0 | -3.457041 | -2.301164 | -2.810285 |
| 36 | 1 | 0 | -1.930902 | -2.260533 | -1.901300 |
| 37 | 1 | 0 | -2.150414 | -1.192617 | -3.306702 |
| 38 | 1 | 0 | -3.906245 | 0.089846  | -2.138104 |
| 39 | 1 | 0 | -1.266327 | 3.982971  | -1.624567 |
| 40 | 1 | 0 | 0.056303  | 2.822815  | -1.884994 |
| 41 | 1 | 0 | 0.178895  | 4.024687  | -0.584858 |
| 42 | 1 | 0 | -1.732537 | 2.989232  | 0.616877  |
| 43 | 1 | 0 | 0.271469  | 0.796000  | 4.205764  |
| 44 | 1 | 0 | 1.642556  | 1.495646  | 3.326701  |
| 45 | 1 | 0 | 1.775112  | -0.135542 | 4.035014  |
| 46 | 1 | 0 | 0.026997  | -0.986780 | 2.478316  |
| 47 | 1 | 0 | 5.606051  | -0.600371 | 0.510195  |
| 48 | 1 | 0 | 5.628306  | -1.079777 | -1.199788 |
| 49 | 1 | 0 | 5.263651  | -3.235670 | -0.133513 |
| 50 | 1 | 0 | 4.259868  | -2.515298 | 1.134740  |
| 51 | 1 | 0 | 3.521770  | -2.890552 | -1.820049 |
| 52 | 1 | 0 | 2.550228  | -3.371027 | -0.425391 |
| 53 | 1 | 0 | 2.191660  | -0.954839 | -1.770374 |
| 54 | 1 | 0 | 5.374307  | 1.836301  | 0.298953  |
| 55 | 1 | 0 | 4.703688  | 2.876457  | -0.980868 |
| 56 | 1 | 0 | 5.700256  | 1.455520  | -1.395875 |

**IIb ( ${}^D E: {}^D P^L \beta_3$ )**

|   |   |   |           |           |          |
|---|---|---|-----------|-----------|----------|
| 1 | 6 | 0 | -5.134138 | -0.972972 | 2.852398 |
| 2 | 6 | 0 | -5.022399 | -0.104184 | 1.614334 |

|    |   |   |           |           |           |
|----|---|---|-----------|-----------|-----------|
| 3  | 8 | 0 | -5.001704 | 1.134355  | 1.696116  |
| 4  | 7 | 0 | -4.928484 | -0.740409 | 0.416541  |
| 5  | 6 | 0 | -4.903814 | 0.002071  | -0.864653 |
| 6  | 6 | 0 | -5.388388 | -1.042473 | -1.876703 |
| 7  | 6 | 0 | -4.850052 | -2.367465 | -1.309267 |
| 8  | 6 | 0 | -4.993579 | -2.200748 | 0.212640  |
| 9  | 6 | 0 | -3.476177 | 0.517668  | -1.189053 |
| 10 | 8 | 0 | -2.817251 | 0.079177  | -2.132828 |
| 11 | 7 | 0 | -3.029812 | 1.492906  | -0.356998 |
| 12 | 1 | 0 | -3.585250 | 1.670431  | 0.481811  |
| 13 | 6 | 0 | -1.645670 | 1.929802  | -0.388649 |
| 14 | 6 | 0 | -1.486899 | 3.209126  | 0.445740  |
| 15 | 6 | 0 | -0.707401 | 0.825159  | 0.152266  |
| 16 | 8 | 0 | -1.039608 | 0.077972  | 1.072230  |
| 17 | 7 | 0 | 0.520824  | 0.790018  | -0.423773 |
| 18 | 1 | 0 | 0.755465  | 1.391501  | -1.206746 |
| 19 | 6 | 0 | 1.567721  | -0.121112 | 0.004590  |
| 20 | 6 | 0 | 1.379416  | -1.537548 | -0.578030 |
| 21 | 6 | 0 | 2.906535  | 0.482490  | -0.445910 |
| 22 | 8 | 0 | 2.968691  | 1.296776  | -1.371714 |
| 23 | 7 | 0 | 4.000561  | 0.034524  | 0.214142  |
| 24 | 1 | 0 | 3.930325  | -0.658526 | 0.953702  |
| 25 | 6 | 0 | 5.354412  | 0.410045  | -0.160665 |
| 26 | 6 | 0 | 5.751377  | 1.784870  | 0.414629  |
| 27 | 6 | 0 | 6.286060  | -0.697437 | 0.361245  |
| 28 | 8 | 0 | 5.938112  | -1.441732 | 1.278536  |
| 29 | 7 | 0 | 7.505093  | -0.758267 | -0.234809 |
| 30 | 1 | 0 | 7.690339  | -0.135474 | -1.009995 |
| 31 | 6 | 0 | 8.546194  | -1.697304 | 0.160738  |
| 32 | 1 | 0 | 9.464732  | -1.164259 | 0.430047  |
| 33 | 1 | 0 | 8.764308  | -2.403426 | -0.648656 |
| 34 | 1 | 0 | 8.185311  | -2.251865 | 1.027874  |
| 35 | 1 | 0 | 6.759351  | 2.072569  | 0.093764  |
| 36 | 1 | 0 | 5.727666  | 1.762587  | 1.509458  |
| 37 | 1 | 0 | 5.046878  | 2.541357  | 0.058113  |
| 38 | 1 | 0 | 5.399405  | 0.458297  | -1.255560 |
| 39 | 1 | 0 | 2.151579  | -2.222381 | -0.208596 |
| 40 | 1 | 0 | 1.425650  | -1.511501 | -1.672108 |
| 41 | 1 | 0 | 0.400776  | -1.919852 | -0.275958 |
| 42 | 1 | 0 | 1.533150  | -0.182388 | 1.098655  |
| 43 | 1 | 0 | -0.453460 | 3.568805  | 0.408246  |
| 44 | 1 | 0 | -1.746897 | 3.021625  | 1.493719  |
| 45 | 1 | 0 | -2.142836 | 3.995835  | 0.057850  |
| 46 | 1 | 0 | -1.384570 | 2.132556  | -1.433356 |
| 47 | 1 | 0 | -5.959719 | -2.586604 | 0.566436  |
| 48 | 1 | 0 | -4.198954 | -2.708987 | 0.768901  |
| 49 | 1 | 0 | -3.795921 | -2.478025 | -1.581429 |
| 50 | 1 | 0 | -5.392919 | -3.244629 | -1.675430 |
| 51 | 1 | 0 | -5.015058 | -0.834263 | -2.881139 |
| 52 | 1 | 0 | -6.485212 | -1.046109 | -1.897409 |

|    |   |   |           |           |           |
|----|---|---|-----------|-----------|-----------|
| 53 | 1 | 0 | -5.574773 | 0.863216  | -0.778036 |
| 54 | 1 | 0 | -5.958804 | -1.691543 | 2.779977  |
| 55 | 1 | 0 | -5.294766 | -0.321904 | 3.712959  |
| 56 | 1 | 0 | -4.208174 | -1.540758 | 3.004563  |

**IIb ( ${}^D F: {}^D P^L \alpha_3$ )**

|    |   |   |           |           |           |
|----|---|---|-----------|-----------|-----------|
| 1  | 6 | 0 | -2.987180 | -1.541646 | 2.523105  |
| 2  | 6 | 0 | -2.862076 | -0.474376 | 1.455007  |
| 3  | 8 | 0 | -2.389081 | 0.646679  | 1.702632  |
| 4  | 7 | 0 | -3.278169 | -0.786431 | 0.200688  |
| 5  | 6 | 0 | -3.192194 | 0.219882  | -0.863402 |
| 6  | 6 | 0 | -3.808770 | -0.497212 | -2.088343 |
| 7  | 6 | 0 | -3.577524 | -1.991983 | -1.805388 |
| 8  | 6 | 0 | -3.741046 | -2.099430 | -0.282664 |
| 9  | 6 | 0 | -1.730253 | 0.630401  | -1.102514 |
| 10 | 8 | 0 | -0.843918 | -0.205212 | -1.289364 |
| 11 | 7 | 0 | -1.490762 | 1.968185  | -1.123692 |
| 12 | 1 | 0 | -2.223374 | 2.594003  | -0.813098 |
| 13 | 6 | 0 | -0.158779 | 2.520354  | -1.355101 |
| 14 | 6 | 0 | -0.244363 | 4.039004  | -1.547038 |
| 15 | 6 | 0 | 0.872920  | 2.172188  | -0.262170 |
| 16 | 8 | 0 | 2.074254  | 2.274261  | -0.530548 |
| 17 | 7 | 0 | 0.413299  | 1.777533  | 0.948938  |
| 18 | 1 | 0 | -0.581534 | 1.614696  | 1.093979  |
| 19 | 6 | 0 | 1.329426  | 1.398127  | 2.024412  |
| 20 | 6 | 0 | 0.631768  | 1.491122  | 3.385258  |
| 21 | 6 | 0 | 1.997414  | 0.015750  | 1.834389  |
| 22 | 8 | 0 | 2.875791  | -0.331199 | 2.622070  |
| 23 | 7 | 0 | 1.594189  | -0.734406 | 0.772754  |
| 24 | 1 | 0 | 0.835572  | -0.404044 | 0.182910  |
| 25 | 6 | 0 | 2.265663  | -1.968017 | 0.378670  |
| 26 | 6 | 0 | 1.250646  | -3.072482 | 0.060494  |
| 27 | 6 | 0 | 3.253908  | -1.784928 | -0.798650 |
| 28 | 8 | 0 | 3.801536  | -2.771866 | -1.295516 |
| 29 | 7 | 0 | 3.490493  | -0.522265 | -1.224013 |
| 30 | 1 | 0 | 3.032776  | 0.264735  | -0.777317 |
| 31 | 6 | 0 | 4.449383  | -0.252259 | -2.283926 |
| 32 | 1 | 0 | 4.439932  | 0.820321  | -2.490151 |
| 33 | 1 | 0 | 4.184563  | -0.802283 | -3.193241 |
| 34 | 1 | 0 | 5.459700  | -0.557168 | -1.987567 |
| 35 | 1 | 0 | 1.777431  | -3.968269 | -0.276804 |
| 36 | 1 | 0 | 0.562849  | -2.754531 | -0.732232 |
| 37 | 1 | 0 | 0.666613  | -3.313352 | 0.955958  |
| 38 | 1 | 0 | 2.879465  | -2.268724 | 1.233771  |
| 39 | 1 | 0 | 1.325870  | 1.170748  | 4.165948  |
| 40 | 1 | 0 | -0.260084 | 0.856188  | 3.419132  |
| 41 | 1 | 0 | 0.324874  | 2.523677  | 3.584782  |
| 42 | 1 | 0 | 2.167868  | 2.101859  | 1.997874  |
| 43 | 1 | 0 | 0.756056  | 4.440758  | -1.726014 |



|    |   |   |           |           |           |
|----|---|---|-----------|-----------|-----------|
| 44 | 1 | 0 | -0.655254 | 4.531255  | -0.656459 |
| 45 | 1 | 0 | -0.877394 | 4.281864  | -2.407799 |
| 46 | 1 | 0 | 0.240447  | 2.061493  | -2.265035 |
| 47 | 1 | 0 | -4.791051 | -2.262150 | 0.000075  |
| 48 | 1 | 0 | -3.139818 | -2.904985 | 0.147115  |
| 49 | 1 | 0 | -2.559242 | -2.272634 | -2.089389 |
| 50 | 1 | 0 | -4.279455 | -2.637336 | -2.342317 |
| 51 | 1 | 0 | -3.359568 | -0.168815 | -3.029970 |
| 52 | 1 | 0 | -4.881171 | -0.272715 | -2.131484 |
| 53 | 1 | 0 | -3.775027 | 1.102339  | -0.575031 |
| 54 | 1 | 0 | -3.959777 | -2.044576 | 2.495449  |
| 55 | 1 | 0 | -2.846002 | -1.073445 | 3.498512  |
| 56 | 1 | 0 | -2.210925 | -2.305486 | 2.388639  |

### IIIa ( ${}^L E: {}^L P_2 {}^L \beta_2$ )

|    |   |   |           |           |           |
|----|---|---|-----------|-----------|-----------|
| 1  | 6 | 0 | -6.000396 | -2.395395 | -1.658415 |
| 2  | 6 | 0 | -5.300273 | -1.323512 | -0.841502 |
| 3  | 8 | 0 | -5.515348 | -0.119969 | -1.023497 |
| 4  | 7 | 0 | -4.414989 | -1.747203 | 0.103335  |
| 5  | 6 | 0 | -3.693606 | -0.766398 | 0.923631  |
| 6  | 6 | 0 | -3.063083 | -1.641142 | 2.031687  |
| 7  | 6 | 0 | -2.840533 | -3.004027 | 1.351403  |
| 8  | 6 | 0 | -4.038080 | -3.139741 | 0.396674  |
| 9  | 6 | 0 | -2.612983 | -0.056672 | 0.085486  |
| 10 | 8 | 0 | -1.783164 | -0.733020 | -0.540851 |
| 11 | 7 | 0 | -2.568426 | 1.298253  | 0.101560  |
| 12 | 6 | 0 | -1.629769 | 2.010666  | -0.799642 |
| 13 | 6 | 0 | -2.339431 | 3.342324  | -1.073270 |
| 14 | 6 | 0 | -3.140031 | 3.601930  | 0.213107  |
| 15 | 6 | 0 | -3.614494 | 2.203908  | 0.637462  |
| 16 | 6 | 0 | -0.244110 | 2.199164  | -0.133580 |
| 17 | 8 | 0 | 0.150948  | 3.300621  | 0.256305  |
| 18 | 7 | 0 | 0.494580  | 1.066088  | -0.031426 |
| 19 | 1 | 0 | 0.087850  | 0.173814  | -0.316291 |
| 20 | 6 | 0 | 1.808524  | 1.068263  | 0.595198  |
| 21 | 6 | 0 | 1.725219  | 0.911516  | 2.127345  |
| 22 | 6 | 0 | 2.629007  | -0.078672 | -0.006684 |
| 23 | 8 | 0 | 2.119323  | -1.168994 | -0.269699 |
| 24 | 7 | 0 | 3.950007  | 0.180070  | -0.181647 |
| 25 | 1 | 0 | 4.353554  | 1.080129  | 0.059155  |
| 26 | 6 | 0 | 4.893020  | -0.831997 | -0.627403 |
| 27 | 6 | 0 | 4.901469  | -0.974382 | -2.163314 |
| 28 | 6 | 0 | 6.279313  | -0.419282 | -0.105734 |
| 29 | 8 | 0 | 6.534218  | 0.753830  | 0.167705  |
| 30 | 7 | 0 | 7.186628  | -1.426864 | -0.010406 |
| 31 | 1 | 0 | 6.880921  | -2.367406 | -0.222315 |
| 32 | 6 | 0 | 8.570354  | -1.224774 | 0.396536  |
| 33 | 1 | 0 | 9.258861  | -1.565556 | -0.384975 |

|    |   |   |           |           |           |
|----|---|---|-----------|-----------|-----------|
| 34 | 1 | 0 | 8.786755  | -1.763953 | 1.325893  |
| 35 | 1 | 0 | 8.717069  | -0.156782 | 0.562896  |
| 36 | 1 | 0 | 5.588640  | -1.766121 | -2.484172 |
| 37 | 1 | 0 | 5.209940  | -0.034208 | -2.633069 |
| 38 | 1 | 0 | 3.894922  | -1.230161 | -2.505805 |
| 39 | 1 | 0 | 4.588660  | -1.788755 | -0.186128 |
| 40 | 1 | 0 | 2.723004  | 0.953996  | 2.580209  |
| 41 | 1 | 0 | 1.263469  | -0.046898 | 2.388052  |
| 42 | 1 | 0 | 1.123082  | 1.725294  | 2.542579  |
| 43 | 1 | 0 | 2.273078  | 2.032861  | 0.366089  |
| 44 | 1 | 0 | -3.691933 | 2.108736  | 1.725626  |
| 45 | 1 | 0 | -4.578037 | 1.944977  | 0.185335  |
| 46 | 1 | 0 | -3.983523 | 4.282998  | 0.062057  |
| 47 | 1 | 0 | -2.481449 | 4.033548  | 0.973737  |
| 48 | 1 | 0 | -3.014777 | 3.219669  | -1.928219 |
| 49 | 1 | 0 | -1.627356 | 4.140100  | -1.293486 |
| 50 | 1 | 0 | -1.500940 | 1.404251  | -1.701853 |
| 51 | 1 | 0 | -3.773448 | -3.675689 | -0.520398 |
| 52 | 1 | 0 | -4.877047 | -3.667782 | 0.872930  |
| 53 | 1 | 0 | -2.792522 | -3.830166 | 2.068284  |
| 54 | 1 | 0 | -1.911063 | -2.982067 | 0.777507  |
| 55 | 1 | 0 | -3.776539 | -1.732196 | 2.860143  |
| 56 | 1 | 0 | -2.138961 | -1.210581 | 2.428630  |
| 57 | 1 | 0 | -4.407398 | -0.047930 | 1.328079  |
| 58 | 1 | 0 | -5.290862 | -2.887470 | -2.335434 |
| 59 | 1 | 0 | -6.780859 | -1.918176 | -2.253237 |
| 60 | 1 | 0 | -6.446206 | -3.171301 | -1.025344 |

**IIIa ( ${}^L F: {}^L \alpha_4$ )**

|    |   |   |           |           |           |
|----|---|---|-----------|-----------|-----------|
| 1  | 6 | 0 | -4.366802 | -0.148091 | 2.535752  |
| 2  | 6 | 0 | -3.201446 | -0.470563 | 1.618933  |
| 3  | 8 | 0 | -2.035273 | -0.196409 | 1.929027  |
| 4  | 7 | 0 | -3.486619 | -1.051341 | 0.419110  |
| 5  | 6 | 0 | -2.401984 | -1.584299 | -0.422867 |
| 6  | 6 | 0 | -3.145631 | -2.276418 | -1.600309 |
| 7  | 6 | 0 | -4.583649 | -1.725985 | -1.551795 |
| 8  | 6 | 0 | -4.819108 | -1.450055 | -0.061834 |
| 9  | 6 | 0 | -1.287569 | -0.618105 | -0.866451 |
| 10 | 8 | 0 | -0.155107 | -1.104805 | -0.977395 |
| 11 | 7 | 0 | -1.497812 | 0.701255  | -1.131473 |
| 12 | 6 | 0 | -0.338324 | 1.510951  | -1.560026 |
| 13 | 6 | 0 | -0.971211 | 2.823503  | -2.069751 |
| 14 | 6 | 0 | -2.288069 | 2.922950  | -1.286149 |
| 15 | 6 | 0 | -2.760541 | 1.465376  | -1.202400 |
| 16 | 6 | 0 | 0.718721  | 1.751670  | -0.466235 |
| 17 | 8 | 0 | 1.810136  | 2.221910  | -0.804198 |
| 18 | 7 | 0 | 0.412000  | 1.434080  | 0.814275  |
| 19 | 1 | 0 | -0.462838 | 0.958738  | 1.026596  |
| 20 | 6 | 0 | 1.405886  | 1.538854  | 1.882659  |

|    |   |   |           |           |           |
|----|---|---|-----------|-----------|-----------|
| 21 | 6 | 0 | 0.722986  | 1.548833  | 3.254392  |
| 22 | 6 | 0 | 2.514462  | 0.460675  | 1.829463  |
| 23 | 8 | 0 | 3.482283  | 0.572471  | 2.580793  |
| 24 | 7 | 0 | 2.368087  | -0.543869 | 0.925067  |
| 25 | 1 | 0 | 1.515973  | -0.607271 | 0.374236  |
| 26 | 6 | 0 | 3.402124  | -1.543734 | 0.680649  |
| 27 | 6 | 0 | 2.811178  | -2.958586 | 0.665112  |
| 28 | 6 | 0 | 4.219374  | -1.277042 | -0.606115 |
| 29 | 8 | 0 | 5.023944  | -2.120017 | -1.009771 |
| 30 | 7 | 0 | 4.023874  | -0.091406 | -1.230765 |
| 31 | 1 | 0 | 3.368990  | 0.583749  | -0.851893 |
| 32 | 6 | 0 | 4.795195  | 0.278539  | -2.406415 |
| 33 | 1 | 0 | 4.364198  | 1.188979  | -2.829487 |
| 34 | 1 | 0 | 4.762201  | -0.524101 | -3.149759 |
| 35 | 1 | 0 | 5.846890  | 0.460488  | -2.152771 |
| 36 | 1 | 0 | 3.597499  | -3.682375 | 0.438110  |
| 37 | 1 | 0 | 2.028216  | -3.046988 | -0.097591 |
| 38 | 1 | 0 | 2.373583  | -3.192190 | 1.641715  |
| 39 | 1 | 0 | 4.114665  | -1.451347 | 1.506966  |
| 40 | 1 | 0 | 1.487450  | 1.605170  | 4.033141  |
| 41 | 1 | 0 | 0.126167  | 0.643472  | 3.409027  |
| 42 | 1 | 0 | 0.060595  | 2.417066  | 3.343814  |
| 43 | 1 | 0 | 1.943844  | 2.480855  | 1.736150  |
| 44 | 1 | 0 | -3.389481 | 1.276118  | -0.333597 |
| 45 | 1 | 0 | -3.323335 | 1.186682  | -2.104499 |
| 46 | 1 | 0 | -3.029448 | 3.567804  | -1.768324 |
| 47 | 1 | 0 | -2.104899 | 3.313420  | -0.278171 |
| 48 | 1 | 0 | -1.172849 | 2.738172  | -3.144212 |
| 49 | 1 | 0 | -0.303265 | 3.675539  | -1.922873 |
| 50 | 1 | 0 | 0.201558  | 0.987738  | -2.353351 |
| 51 | 1 | 0 | -5.551434 | -0.656455 | 0.113514  |
| 52 | 1 | 0 | -5.166040 | -2.354696 | 0.459414  |
| 53 | 1 | 0 | -5.317020 | -2.426774 | -1.961858 |
| 54 | 1 | 0 | -4.661961 | -0.792922 | -2.120709 |
| 55 | 1 | 0 | -3.146287 | -3.358760 | -1.434221 |
| 56 | 1 | 0 | -2.652232 | -2.099409 | -2.559989 |
| 57 | 1 | 0 | -1.839620 | -2.323567 | 0.154953  |
| 58 | 1 | 0 | -5.016497 | 0.619430  | 2.096547  |
| 59 | 1 | 0 | -3.966850 | 0.227858  | 3.478498  |
| 60 | 1 | 0 | -4.985892 | -1.031506 | 2.729796  |

### IIIb ( ${}^D E: {}^D P^L P^L \beta_2$ )

|   |   |   |           |           |           |
|---|---|---|-----------|-----------|-----------|
| 1 | 6 | 0 | -2.409430 | -3.420698 | 2.101598  |
| 2 | 6 | 0 | -2.948167 | -2.101305 | 1.577120  |
| 3 | 8 | 0 | -2.889997 | -1.060440 | 2.239890  |
| 4 | 7 | 0 | -3.497799 | -2.111912 | 0.329494  |
| 5 | 6 | 0 | -4.014385 | -0.866965 | -0.247523 |
| 6 | 6 | 0 | -4.805734 | -1.361566 | -1.480948 |
| 7 | 6 | 0 | -4.067303 | -2.642974 | -1.908967 |

|    |   |   |           |           |           |
|----|---|---|-----------|-----------|-----------|
| 8  | 6 | 0 | -3.600334 | -3.263332 | -0.581273 |
| 9  | 6 | 0 | -2.855028 | 0.058719  | -0.663050 |
| 10 | 8 | 0 | -1.934065 | -0.390705 | -1.362717 |
| 11 | 7 | 0 | -2.900171 | 1.357328  | -0.285276 |
| 12 | 6 | 0 | -1.916273 | 2.337569  | -0.800783 |
| 13 | 6 | 0 | -2.657457 | 3.670788  | -0.647887 |
| 14 | 6 | 0 | -3.487039 | 3.469670  | 0.631800  |
| 15 | 6 | 0 | -3.935278 | 1.999936  | 0.557259  |
| 16 | 6 | 0 | -0.585790 | 2.321248  | 0.003779  |
| 17 | 8 | 0 | -0.238041 | 3.285287  | 0.690606  |
| 18 | 7 | 0 | 0.156949  | 1.197538  | -0.132752 |
| 19 | 1 | 0 | -0.219791 | 0.409249  | -0.662520 |
| 20 | 6 | 0 | 1.394977  | 1.013549  | 0.612246  |
| 21 | 6 | 0 | 1.143462  | 0.441684  | 2.022237  |
| 22 | 6 | 0 | 2.302789  | 0.070952  | -0.185907 |
| 23 | 8 | 0 | 1.855764  | -0.905842 | -0.788825 |
| 24 | 7 | 0 | 3.628394  | 0.364932  | -0.140555 |
| 25 | 1 | 0 | 3.978320  | 1.163676  | 0.379282  |
| 26 | 6 | 0 | 4.639291  | -0.491395 | -0.737806 |
| 27 | 6 | 0 | 4.822431  | -0.204629 | -2.242324 |
| 28 | 6 | 0 | 5.948196  | -0.251188 | 0.030018  |
| 29 | 8 | 0 | 6.160053  | 0.803551  | 0.629463  |
| 30 | 7 | 0 | 6.862865  | -1.251797 | -0.031928 |
| 31 | 1 | 0 | 6.609110  | -2.120857 | -0.480787 |
| 32 | 6 | 0 | 8.167536  | -1.142202 | 0.609933  |
| 33 | 1 | 0 | 8.761064  | -2.020648 | 0.346880  |
| 34 | 1 | 0 | 8.066795  | -1.085853 | 1.699407  |
| 35 | 1 | 0 | 8.683744  | -0.240906 | 0.266619  |
| 36 | 1 | 0 | 5.560897  | -0.882043 | -2.687148 |
| 37 | 1 | 0 | 5.157659  | 0.826625  | -2.397079 |
| 38 | 1 | 0 | 3.866728  | -0.348855 | -2.754008 |
| 39 | 1 | 0 | 4.310130  | -1.530337 | -0.615358 |
| 40 | 1 | 0 | 2.085602  | 0.335700  | 2.573565  |
| 41 | 1 | 0 | 0.658356  | -0.537380 | 1.957750  |
| 42 | 1 | 0 | 0.490134  | 1.120066  | 2.578384  |
| 43 | 1 | 0 | 1.860616  | 1.999506  | 0.709033  |
| 44 | 1 | 0 | -3.979620 | 1.516638  | 1.537534  |
| 45 | 1 | 0 | -4.917816 | 1.914018  | 0.074874  |
| 46 | 1 | 0 | -4.341471 | 4.150393  | 0.701863  |
| 47 | 1 | 0 | -2.849559 | 3.629684  | 1.506528  |
| 48 | 1 | 0 | -3.311189 | 3.823027  | -1.515997 |
| 49 | 1 | 0 | -1.965100 | 4.510928  | -0.572006 |
| 50 | 1 | 0 | -1.692767 | 2.082635  | -1.842016 |
| 51 | 1 | 0 | -4.331571 | -3.988665 | -0.195718 |
| 52 | 1 | 0 | -2.635744 | -3.770754 | -0.683348 |
| 53 | 1 | 0 | -3.199143 | -2.383304 | -2.519628 |
| 54 | 1 | 0 | -4.705610 | -3.326262 | -2.478637 |
| 55 | 1 | 0 | -4.850434 | -0.613709 | -2.278612 |
| 56 | 1 | 0 | -5.834086 | -1.589682 | -1.174441 |
| 57 | 1 | 0 | -4.658404 | -0.379211 | 0.484614  |

|    |   |   |           |           |          |
|----|---|---|-----------|-----------|----------|
| 58 | 1 | 0 | -3.138167 | -4.233459 | 2.001685 |
| 59 | 1 | 0 | -2.150617 | -3.291952 | 3.153849 |
| 60 | 1 | 0 | -1.508221 | -3.712881 | 1.548094 |

**IIIb ( ${}^D\mathbf{F}: {}^D\mathbf{P}^L\alpha_3$ )**

|    |   |   |           |           |           |
|----|---|---|-----------|-----------|-----------|
| 1  | 6 | 0 | -2.398697 | -2.475296 | 2.405249  |
| 2  | 6 | 0 | -2.539715 | -1.314109 | 1.442012  |
| 3  | 8 | 0 | -2.310747 | -0.143683 | 1.792251  |
| 4  | 7 | 0 | -2.915941 | -1.592822 | 0.169196  |
| 5  | 6 | 0 | -3.053110 | -0.496685 | -0.801342 |
| 6  | 6 | 0 | -3.493739 | -1.218853 | -2.098009 |
| 7  | 6 | 0 | -2.944140 | -2.647915 | -1.943094 |
| 8  | 6 | 0 | -3.076829 | -2.925380 | -0.438895 |
| 9  | 6 | 0 | -1.706613 | 0.226743  | -0.968394 |
| 10 | 8 | 0 | -0.680147 | -0.422872 | -1.210112 |
| 11 | 7 | 0 | -1.683675 | 1.579372  | -0.860873 |
| 12 | 6 | 0 | -0.425551 | 2.305350  | -1.091793 |
| 13 | 6 | 0 | -0.876947 | 3.778844  | -1.165938 |
| 14 | 6 | 0 | -2.102775 | 3.827822  | -0.238951 |
| 15 | 6 | 0 | -2.796710 | 2.475265  | -0.473364 |
| 16 | 6 | 0 | 0.656723  | 2.077004  | -0.021398 |
| 17 | 8 | 0 | 1.814150  | 2.431630  | -0.269003 |
| 18 | 7 | 0 | 0.294479  | 1.497268  | 1.148670  |
| 19 | 1 | 0 | -0.646232 | 1.124772  | 1.265454  |
| 20 | 6 | 0 | 1.285927  | 1.174766  | 2.173862  |
| 21 | 6 | 0 | 0.612059  | 0.983850  | 3.536570  |
| 22 | 6 | 0 | 2.189692  | -0.031724 | 1.825644  |
| 23 | 8 | 0 | 3.143583  | -0.288226 | 2.558404  |
| 24 | 7 | 0 | 1.893311  | -0.731970 | 0.696569  |
| 25 | 1 | 0 | 1.064163  | -0.495220 | 0.157217  |
| 26 | 6 | 0 | 2.767560  | -1.771099 | 0.162789  |
| 27 | 6 | 0 | 1.961030  | -3.001856 | -0.269307 |
| 28 | 6 | 0 | 3.673710  | -1.284941 | -0.994449 |
| 29 | 8 | 0 | 4.380408  | -2.096134 | -1.597481 |
| 30 | 7 | 0 | 3.661450  | 0.036636  | -1.285287 |
| 31 | 1 | 0 | 3.087038  | 0.676698  | -0.747678 |
| 32 | 6 | 0 | 4.530477  | 0.589472  | -2.312330 |
| 33 | 1 | 0 | 4.296590  | 1.650478  | -2.425010 |
| 34 | 1 | 0 | 4.372503  | 0.075719  | -3.266295 |
| 35 | 1 | 0 | 5.586370  | 0.476818  | -2.039328 |
| 36 | 1 | 0 | 2.630723  | -3.740747 | -0.715708 |
| 37 | 1 | 0 | 1.200108  | -2.729321 | -1.010472 |
| 38 | 1 | 0 | 1.461102  | -3.446207 | 0.598764  |
| 39 | 1 | 0 | 3.449974  | -2.045084 | 0.973622  |
| 40 | 1 | 0 | 1.369156  | 0.710190  | 4.275450  |
| 41 | 1 | 0 | -0.148444 | 0.196543  | 3.497935  |
| 42 | 1 | 0 | 0.125822  | 1.912976  | 3.853476  |
| 43 | 1 | 0 | 1.981694  | 2.018185  | 2.228847  |
| 44 | 1 | 0 | -3.293228 | 2.101752  | 0.425981  |

|    |   |   |           |           |           |
|----|---|---|-----------|-----------|-----------|
| 45 | 1 | 0 | -3.532624 | 2.540887  | -1.285833 |
| 46 | 1 | 0 | -2.767258 | 4.670646  | -0.451861 |
| 47 | 1 | 0 | -1.785645 | 3.907369  | 0.807080  |
| 48 | 1 | 0 | -1.165728 | 4.016697  | -2.196764 |
| 49 | 1 | 0 | -0.076359 | 4.463358  | -0.875157 |
| 50 | 1 | 0 | 0.028999  | 1.967525  | -2.026737 |
| 51 | 1 | 0 | -4.063794 | -3.341133 | -0.189847 |
| 52 | 1 | 0 | -2.310913 | -3.614266 | -0.072855 |
| 53 | 1 | 0 | -1.889831 | -2.674249 | -2.231646 |
| 54 | 1 | 0 | -3.490859 | -3.378594 | -2.547171 |
| 55 | 1 | 0 | -3.122945 | -0.719196 | -2.997664 |
| 56 | 1 | 0 | -4.589223 | -1.229088 | -2.146317 |
| 57 | 1 | 0 | -3.820154 | 0.196839  | -0.451859 |
| 58 | 1 | 0 | -3.230353 | -3.183763 | 2.328598  |
| 59 | 1 | 0 | -2.349566 | -2.079099 | 3.420792  |
| 60 | 1 | 0 | -1.470530 | -3.024143 | 2.201407  |

Cartesian coordinates of the optimized geometries of end-protected tetraalanine (**Ia**, **Ib**) in fully-extended (<sup>L</sup>E and <sup>D</sup>E), semi-extended (<sup>L</sup>S and <sup>D</sup>S), and fully-folded structures (<sup>L</sup>F and <sup>D</sup>F) in presence of solvent.

**Ia** (<sup>L</sup>S: <sup>L</sup>P<sub>4</sub>)

|    |   |   |           |           |           |
|----|---|---|-----------|-----------|-----------|
| 1  | 6 | 0 | -7.693995 | -0.299482 | 1.180429  |
| 2  | 6 | 0 | -6.513967 | -0.279630 | 0.240244  |
| 3  | 8 | 0 | -6.186345 | -1.291574 | -0.417206 |
| 4  | 7 | 0 | -5.833206 | 0.880646  | 0.133583  |
| 5  | 1 | 0 | -6.097954 | 1.657388  | 0.729071  |
| 6  | 6 | 0 | -4.650542 | 1.034804  | -0.704518 |
| 7  | 6 | 0 | -4.241326 | 2.511720  | -0.744576 |
| 8  | 6 | 0 | -3.487877 | 0.179191  | -0.171500 |
| 9  | 8 | 0 | -3.247805 | 0.083969  | 1.046356  |
| 10 | 7 | 0 | -2.730362 | -0.422665 | -1.107200 |
| 11 | 1 | 0 | -2.973803 | -0.302177 | -2.085015 |
| 12 | 6 | 0 | -1.549307 | -1.218267 | -0.787987 |
| 13 | 6 | 0 | -1.045554 | -1.917741 | -2.055598 |
| 14 | 6 | 0 | -0.429126 | -0.338322 | -0.204939 |
| 15 | 8 | 0 | -0.152460 | 0.776096  | -0.686152 |
| 16 | 7 | 0 | 0.256050  | -0.872005 | 0.822796  |
| 17 | 1 | 0 | 0.001152  | -1.797174 | 1.152753  |
| 18 | 6 | 0 | 1.416303  | -0.227899 | 1.426873  |
| 19 | 6 | 0 | 1.834344  | -1.004074 | 2.680496  |
| 20 | 6 | 0 | 2.586548  | -0.159034 | 0.429459  |
| 21 | 8 | 0 | 2.850444  | -1.100065 | -0.341454 |
| 22 | 7 | 0 | 3.324372  | 0.964548  | 0.479547  |
| 23 | 1 | 0 | 3.055365  | 1.697014  | 1.128308  |
| 24 | 6 | 0 | 4.507694  | 1.182385  | -0.346922 |
| 25 | 6 | 0 | 4.997839  | 2.623132  | -0.161293 |
| 26 | 6 | 0 | 5.630213  | 0.193899  | 0.017258  |
| 27 | 8 | 0 | 5.886539  | -0.099375 | 1.203167  |
| 28 | 7 | 0 | 6.343069  | -0.283849 | -1.013901 |
| 29 | 1 | 0 | 6.075374  | -0.018204 | -1.954661 |
| 30 | 6 | 0 | 7.502864  | -1.150417 | -0.837107 |
| 31 | 1 | 0 | 7.908562  | -1.383133 | -1.822430 |
| 32 | 1 | 0 | 7.220518  | -2.083022 | -0.338552 |
| 33 | 1 | 0 | 8.274234  | -0.652081 | -0.241190 |
| 34 | 1 | 0 | 5.854094  | 2.817448  | -0.813510 |
| 35 | 1 | 0 | 5.300195  | 2.803081  | 0.876341  |
| 36 | 1 | 0 | 4.200819  | 3.326890  | -0.423609 |
| 37 | 1 | 0 | 4.228312  | 1.026486  | -1.394276 |
| 38 | 1 | 0 | 2.685468  | -0.515049 | 3.162962  |
| 39 | 1 | 0 | 2.119088  | -2.031595 | 2.427996  |
| 40 | 1 | 0 | 1.003311  | -1.031906 | 3.393101  |
| 41 | 1 | 0 | 1.135897  | 0.791820  | 1.708573  |
| 42 | 1 | 0 | -0.168431 | -2.529646 | -1.825553 |

|    |   |   |           |           |           |
|----|---|---|-----------|-----------|-----------|
| 43 | 1 | 0 | -0.767860 | -1.184787 | -2.821007 |
| 44 | 1 | 0 | -1.825345 | -2.572458 | -2.458493 |
| 45 | 1 | 0 | -1.832283 | -1.970799 | -0.044596 |
| 46 | 1 | 0 | -3.370522 | 2.646952  | -1.392320 |
| 47 | 1 | 0 | -3.990087 | 2.875592  | 0.258025  |
| 48 | 1 | 0 | -5.063901 | 3.114482  | -1.143624 |
| 49 | 1 | 0 | -4.897584 | 0.699291  | -1.716490 |
| 50 | 1 | 0 | -7.870892 | 0.664877  | 1.664555  |
| 51 | 1 | 0 | -7.521696 | -1.059685 | 1.950315  |
| 52 | 1 | 0 | -8.589140 | -0.590333 | 0.619950  |

**Ib (PS: DP<sup>L</sup>P<sub>3</sub>)**

|    |   |   |           |           |           |
|----|---|---|-----------|-----------|-----------|
| 1  | 6 | 0 | -5.907625 | 3.082081  | 0.293061  |
| 2  | 6 | 0 | -5.153746 | 1.919184  | -0.310659 |
| 3  | 8 | 0 | -4.114674 | 2.071302  | -0.986999 |
| 4  | 7 | 0 | -5.676365 | 0.694295  | -0.083683 |
| 5  | 1 | 0 | -6.484613 | 0.619753  | 0.524482  |
| 6  | 6 | 0 | -5.066397 | -0.538282 | -0.561191 |
| 7  | 6 | 0 | -6.006468 | -1.718300 | -0.280909 |
| 8  | 6 | 0 | -3.703849 | -0.787655 | 0.111469  |
| 9  | 8 | 0 | -3.469616 | -0.444404 | 1.284560  |
| 10 | 7 | 0 | -2.809051 | -1.459371 | -0.638338 |
| 11 | 1 | 0 | -3.047107 | -1.686789 | -1.598484 |
| 12 | 6 | 0 | -1.523492 | -1.919064 | -0.126681 |
| 13 | 6 | 0 | -0.923162 | -2.945754 | -1.093886 |
| 14 | 6 | 0 | -0.545606 | -0.744580 | 0.050316  |
| 15 | 8 | 0 | -0.431542 | 0.147866  | -0.810166 |
| 16 | 7 | 0 | 0.207956  | -0.776892 | 1.164846  |
| 17 | 1 | 0 | 0.084724  | -1.545928 | 1.815494  |
| 18 | 6 | 0 | 1.280889  | 0.174758  | 1.428355  |
| 19 | 6 | 0 | 1.798345  | -0.022426 | 2.857897  |
| 20 | 6 | 0 | 2.431231  | -0.008233 | 0.421585  |
| 21 | 8 | 0 | 2.794002  | -1.135430 | 0.037515  |
| 22 | 7 | 0 | 3.035492  | 1.123134  | 0.015505  |
| 23 | 1 | 0 | 2.705613  | 2.010214  | 0.381363  |
| 24 | 6 | 0 | 4.205662  | 1.135133  | -0.857997 |
| 25 | 6 | 0 | 4.567811  | 2.584142  | -1.201012 |
| 26 | 6 | 0 | 5.402165  | 0.438537  | -0.186842 |
| 27 | 8 | 0 | 5.678762  | 0.631249  | 1.014924  |
| 28 | 7 | 0 | 6.146722  | -0.344070 | -0.981718 |
| 29 | 1 | 0 | 5.859827  | -0.473799 | -1.944925 |
| 30 | 6 | 0 | 7.354865  | -1.016703 | -0.516984 |
| 31 | 1 | 0 | 7.768774  | -1.588959 | -1.348153 |
| 32 | 1 | 0 | 7.124933  | -1.697790 | 0.308543  |
| 33 | 1 | 0 | 8.099419  | -0.290307 | -0.175844 |
| 34 | 1 | 0 | 5.434369  | 2.609923  | -1.868257 |
| 35 | 1 | 0 | 4.809554  | 3.150398  | -0.294484 |
| 36 | 1 | 0 | 3.729435  | 3.072149  | -1.709207 |
| 37 | 1 | 0 | 3.954217  | 0.595043  | -1.776731 |



|    |   |   |           |           |           |
|----|---|---|-----------|-----------|-----------|
| 38 | 1 | 0 | 2.583942  | 0.705167  | 3.080059  |
| 39 | 1 | 0 | 2.207818  | -1.030113 | 2.991118  |
| 40 | 1 | 0 | 0.982094  | 0.124214  | 3.572955  |
| 41 | 1 | 0 | 0.876520  | 1.186648  | 1.325030  |
| 42 | 1 | 0 | 0.037389  | -3.306785 | -0.714641 |
| 43 | 1 | 0 | -0.761821 | -2.502420 | -2.082893 |
| 44 | 1 | 0 | -1.597761 | -3.802189 | -1.196196 |
| 45 | 1 | 0 | -1.693496 | -2.390553 | 0.846367  |
| 46 | 1 | 0 | -5.570115 | -2.647429 | -0.658697 |
| 47 | 1 | 0 | -6.966397 | -1.561075 | -0.783747 |
| 48 | 1 | 0 | -6.185933 | -1.828802 | 0.794647  |
| 49 | 1 | 0 | -4.908128 | -0.452387 | -1.641160 |
| 50 | 1 | 0 | -6.939706 | 3.104010  | -0.074886 |
| 51 | 1 | 0 | -5.410676 | 4.017582  | 0.029538  |
| 52 | 1 | 0 | -5.945347 | 2.988854  | 1.384625  |

**Ia ( ${}^L E: {}^L \beta_4$ )**

|    |   |   |           |           |           |
|----|---|---|-----------|-----------|-----------|
| 1  | 6 | 0 | 8.705516  | 0.920363  | -0.375921 |
| 2  | 6 | 0 | 7.531672  | 0.014586  | -0.659722 |
| 3  | 8 | 0 | 7.590759  | -0.865189 | -1.548576 |
| 4  | 7 | 0 | 6.426936  | 0.211831  | 0.085989  |
| 5  | 1 | 0 | 6.430881  | 0.930971  | 0.802091  |
| 6  | 6 | 0 | 5.202722  | -0.570668 | -0.050603 |
| 7  | 6 | 0 | 5.252930  | -1.881521 | 0.756025  |
| 8  | 6 | 0 | 4.035877  | 0.299041  | 0.428408  |
| 9  | 8 | 0 | 4.195599  | 1.151565  | 1.325334  |
| 10 | 7 | 0 | 2.852229  | 0.052561  | -0.153341 |
| 11 | 1 | 0 | 2.788198  | -0.663200 | -0.872090 |
| 12 | 6 | 0 | 1.604630  | 0.701036  | 0.238688  |
| 13 | 6 | 0 | 1.415855  | 2.063309  | -0.453640 |
| 14 | 6 | 0 | 0.453930  | -0.250704 | -0.112412 |
| 15 | 8 | 0 | 0.580431  | -1.112196 | -1.005263 |
| 16 | 7 | 0 | -0.681305 | -0.062174 | 0.578314  |
| 17 | 1 | 0 | -0.709393 | 0.647172  | 1.305223  |
| 18 | 6 | 0 | -1.908388 | -0.821532 | 0.343418  |
| 19 | 6 | 0 | -1.956562 | -2.104662 | 1.189298  |
| 20 | 6 | 0 | -3.090891 | 0.094411  | 0.676963  |
| 21 | 8 | 0 | -3.034833 | 0.879604  | 1.644840  |
| 22 | 7 | 0 | -4.170271 | -0.038101 | -0.108993 |
| 23 | 1 | 0 | -4.130746 | -0.664269 | -0.908144 |
| 24 | 6 | 0 | -5.405045 | 0.723939  | 0.068952  |
| 25 | 6 | 0 | -5.329094 | 2.098275  | -0.618160 |
| 26 | 6 | 0 | -6.548215 | -0.105614 | -0.520246 |
| 27 | 8 | 0 | -6.373985 | -0.793365 | -1.548617 |
| 28 | 7 | 0 | -7.728778 | -0.021662 | 0.106251  |
| 29 | 1 | 0 | -7.791943 | 0.537084  | 0.949750  |
| 30 | 6 | 0 | -8.927428 | -0.699531 | -0.376408 |
| 31 | 1 | 0 | -9.177083 | -0.372155 | -1.390378 |
| 32 | 1 | 0 | -9.752139 | -0.451093 | 0.292649  |

|    |   |   |           |           |           |
|----|---|---|-----------|-----------|-----------|
| 33 | 1 | 0 | -8.784324 | -1.784649 | -0.380775 |
| 34 | 1 | 0 | -6.250161 | 2.664823  | -0.444988 |
| 35 | 1 | 0 | -5.181544 | 1.982923  | -1.697303 |
| 36 | 1 | 0 | -4.490162 | 2.667947  | -0.206554 |
| 37 | 1 | 0 | -5.563870 | 0.862053  | 1.141294  |
| 38 | 1 | 0 | -2.859495 | -2.681064 | 0.961472  |
| 39 | 1 | 0 | -1.948698 | -1.868496 | 2.258678  |
| 40 | 1 | 0 | -1.084539 | -2.725054 | 0.959254  |
| 41 | 1 | 0 | -1.935812 | -1.087305 | -0.715739 |
| 42 | 1 | 0 | 0.512510  | 2.558439  | -0.082875 |
| 43 | 1 | 0 | 1.333849  | 1.939736  | -1.539004 |
| 44 | 1 | 0 | 2.274262  | 2.706284  | -0.236042 |
| 45 | 1 | 0 | 1.627165  | 0.852418  | 1.321724  |
| 46 | 1 | 0 | 4.351231  | -2.475959 | 0.574646  |
| 47 | 1 | 0 | 5.330716  | -1.675447 | 1.829196  |
| 48 | 1 | 0 | 6.122345  | -2.470108 | 0.446956  |
| 49 | 1 | 0 | 5.069684  | -0.807513 | -1.109474 |
| 50 | 1 | 0 | 8.946489  | 1.486083  | -1.282776 |
| 51 | 1 | 0 | 9.577125  | 0.305611  | -0.126383 |
| 52 | 1 | 0 | 8.514943  | 1.619861  | 0.442461  |

**Ib ( ${}^D E: {}^D \beta^L \beta_3$ )**

|    |   |   |           |           |           |
|----|---|---|-----------|-----------|-----------|
| 1  | 6 | 0 | -8.105532 | -1.584062 | -1.459893 |
| 2  | 6 | 0 | -7.154938 | -1.306351 | -0.320364 |
| 3  | 8 | 0 | -7.198642 | -1.974559 | 0.737530  |
| 4  | 7 | 0 | -6.263034 | -0.313989 | -0.507736 |
| 5  | 1 | 0 | -6.272119 | 0.205014  | -1.379794 |
| 6  | 6 | 0 | -5.275268 | 0.087291  | 0.487193  |
| 7  | 6 | 0 | -5.836590 | 1.116858  | 1.485393  |
| 8  | 6 | 0 | -4.064443 | 0.669428  | -0.252069 |
| 9  | 8 | 0 | -4.188786 | 1.225654  | -1.361351 |
| 10 | 7 | 0 | -2.891663 | 0.552734  | 0.391141  |
| 11 | 1 | 0 | -2.876218 | 0.122652  | 1.311839  |
| 12 | 6 | 0 | -1.640276 | 1.153900  | -0.067784 |
| 13 | 6 | 0 | -1.542479 | 2.642913  | 0.305207  |
| 14 | 6 | 0 | -0.499288 | 0.365536  | 0.583439  |
| 15 | 8 | 0 | -0.600389 | -0.041964 | 1.758196  |
| 16 | 7 | 0 | 0.595275  | 0.183768  | -0.169915 |
| 17 | 1 | 0 | 0.603391  | 0.517865  | -1.129398 |
| 18 | 6 | 0 | 1.799441  | -0.492098 | 0.306123  |
| 19 | 6 | 0 | 1.689200  | -2.021921 | 0.175688  |
| 20 | 6 | 0 | 2.985568  | 0.030072  | -0.511994 |
| 21 | 8 | 0 | 2.834426  | 0.413012  | -1.689377 |
| 22 | 7 | 0 | 4.173266  | 0.000764  | 0.111204  |
| 23 | 1 | 0 | 4.220149  | -0.300502 | 1.080713  |
| 24 | 6 | 0 | 5.434690  | 0.387254  | -0.517949 |
| 25 | 6 | 0 | 5.681890  | 1.902756  | -0.423534 |
| 26 | 6 | 0 | 6.555866  | -0.380984 | 0.187958  |
| 27 | 8 | 0 | 6.489422  | -0.629315 | 1.410855  |

|    |   |   |           |           |           |
|----|---|---|-----------|-----------|-----------|
| 28 | 7 | 0 | 7.602238  | -0.732073 | -0.570103 |
| 29 | 1 | 0 | 7.581744  | -0.505941 | -1.557998 |
| 30 | 6 | 0 | 8.783700  | -1.397921 | -0.031500 |
| 31 | 1 | 0 | 9.485520  | -1.559380 | -0.850599 |
| 32 | 1 | 0 | 8.518582  | -2.364740 | 0.407339  |
| 33 | 1 | 0 | 9.263488  | -0.781750 | 0.735508  |
| 34 | 1 | 0 | 6.612982  | 2.170389  | -0.934571 |
| 35 | 1 | 0 | 5.748441  | 2.220463  | 0.622522  |
| 36 | 1 | 0 | 4.858269  | 2.440126  | -0.903879 |
| 37 | 1 | 0 | 5.390780  | 0.093806  | -1.570044 |
| 38 | 1 | 0 | 2.576808  | -2.506090 | 0.595725  |
| 39 | 1 | 0 | 1.588674  | -2.316184 | -0.874636 |
| 40 | 1 | 0 | 0.810937  | -2.374117 | 0.725399  |
| 41 | 1 | 0 | 1.938746  | -0.230682 | 1.358443  |
| 42 | 1 | 0 | -0.614067 | 3.074127  | -0.084254 |
| 43 | 1 | 0 | -1.563453 | 2.772388  | 1.392464  |
| 44 | 1 | 0 | -2.385261 | 3.187516  | -0.131587 |
| 45 | 1 | 0 | -1.592554 | 1.046014  | -1.154405 |
| 46 | 1 | 0 | -5.096511 | 1.342283  | 2.260408  |
| 47 | 1 | 0 | -6.729253 | 0.708503  | 1.969419  |
| 48 | 1 | 0 | -6.108008 | 2.047125  | 0.974053  |
| 49 | 1 | 0 | -4.968314 | -0.808526 | 1.033000  |
| 50 | 1 | 0 | -7.959019 | -0.914063 | -2.311555 |
| 51 | 1 | 0 | -9.134180 | -1.484045 | -1.096880 |
| 52 | 1 | 0 | -7.969605 | -2.619330 | -1.791685 |

**Ia ( ${}^L F: {}^L \alpha_4$ )**

|    |   |   |           |           |           |
|----|---|---|-----------|-----------|-----------|
| 1  | 6 | 0 | 5.302095  | 1.330269  | -0.849538 |
| 2  | 6 | 0 | 4.028582  | 0.532409  | -0.971425 |
| 3  | 8 | 0 | 2.967565  | 1.048126  | -1.381379 |
| 4  | 7 | 0 | 4.080784  | -0.768288 | -0.600943 |
| 5  | 1 | 0 | 4.969179  | -1.152068 | -0.296569 |
| 6  | 6 | 0 | 2.954496  | -1.685710 | -0.750734 |
| 7  | 6 | 0 | 3.428531  | -3.128560 | -0.539566 |
| 8  | 6 | 0 | 1.775017  | -1.376112 | 0.180310  |
| 9  | 8 | 0 | 0.643072  | -1.817956 | -0.094703 |
| 10 | 7 | 0 | 2.014176  | -0.644493 | 1.285298  |
| 11 | 1 | 0 | 2.945065  | -0.267899 | 1.430187  |
| 12 | 6 | 0 | 0.970652  | -0.289882 | 2.240958  |
| 13 | 6 | 0 | 1.600093  | 0.305232  | 3.505549  |
| 14 | 6 | 0 | -0.082677 | 0.667488  | 1.663983  |
| 15 | 8 | 0 | -1.200107 | 0.747633  | 2.212193  |
| 16 | 7 | 0 | 0.246222  | 1.399384  | 0.582891  |
| 17 | 1 | 0 | 1.156904  | 1.265734  | 0.148272  |
| 18 | 6 | 0 | -0.682638 | 2.336780  | -0.043917 |
| 19 | 6 | 0 | 0.062369  | 3.233077  | -1.039480 |
| 20 | 6 | 0 | -1.877182 | 1.655322  | -0.730910 |
| 21 | 8 | 0 | -2.884520 | 2.335960  | -1.003661 |
| 22 | 7 | 0 | -1.779935 | 0.343989  | -1.027870 |

|    |   |   |           |           |           |
|----|---|---|-----------|-----------|-----------|
| 23 | 1 | 0 | -0.949543 | -0.169274 | -0.739402 |
| 24 | 6 | 0 | -2.885975 | -0.422972 | -1.594642 |
| 25 | 6 | 0 | -2.353315 | -1.671245 | -2.308928 |
| 26 | 6 | 0 | -3.954822 | -0.821166 | -0.560940 |
| 27 | 8 | 0 | -5.047212 | -1.275147 | -0.968511 |
| 28 | 7 | 0 | -3.666653 | -0.696076 | 0.741140  |
| 29 | 1 | 0 | -2.789340 | -0.265128 | 1.020213  |
| 30 | 6 | 0 | -4.627227 | -1.030666 | 1.787473  |
| 31 | 1 | 0 | -4.169659 | -0.808666 | 2.752486  |
| 32 | 1 | 0 | -4.888272 | -2.092913 | 1.752099  |
| 33 | 1 | 0 | -5.543311 | -0.440615 | 1.680925  |
| 34 | 1 | 0 | -3.183353 | -2.229689 | -2.749621 |
| 35 | 1 | 0 | -1.821218 | -2.327849 | -1.611894 |
| 36 | 1 | 0 | -1.668059 | -1.380732 | -3.111409 |
| 37 | 1 | 0 | -3.399644 | 0.214932  | -2.318968 |
| 38 | 1 | 0 | -0.631442 | 3.957048  | -1.475064 |
| 39 | 1 | 0 | 0.505606  | 2.641994  | -1.847994 |
| 40 | 1 | 0 | 0.857635  | 3.782481  | -0.525604 |
| 41 | 1 | 0 | -1.124432 | 2.958642  | 0.740810  |
| 42 | 1 | 0 | 0.817381  | 0.567558  | 4.222432  |
| 43 | 1 | 0 | 2.178434  | 1.206591  | 3.272930  |
| 44 | 1 | 0 | 2.263739  | -0.429987 | 3.971829  |
| 45 | 1 | 0 | 0.419499  | -1.197512 | 2.505285  |
| 46 | 1 | 0 | 2.588283  | -3.817885 | -0.658326 |
| 47 | 1 | 0 | 3.852440  | -3.261338 | 0.462249  |
| 48 | 1 | 0 | 4.191085  | -3.382827 | -1.282766 |
| 49 | 1 | 0 | 2.552779  | -1.581967 | -1.763975 |
| 50 | 1 | 0 | 6.149768  | 0.734209  | -0.500874 |
| 51 | 1 | 0 | 5.136323  | 2.160476  | -0.154053 |
| 52 | 1 | 0 | 5.543616  | 1.760568  | -1.827461 |

**Ib ( ${}^D F: {}^D P^L \alpha_3$ )**

|    |   |   |           |           |           |
|----|---|---|-----------|-----------|-----------|
| 1  | 6 | 0 | -2.946390 | -3.485148 | 0.800777  |
| 2  | 6 | 0 | -3.011657 | -1.987822 | 0.630361  |
| 3  | 8 | 0 | -2.683748 | -1.207747 | 1.550749  |
| 4  | 7 | 0 | -3.442858 | -1.529446 | -0.563195 |
| 5  | 1 | 0 | -3.651484 | -2.199512 | -1.294995 |
| 6  | 6 | 0 | -3.542244 | -0.112380 | -0.886008 |
| 7  | 6 | 0 | -4.244024 | 0.059963  | -2.238583 |
| 8  | 6 | 0 | -2.150368 | 0.540532  | -0.936886 |
| 9  | 8 | 0 | -1.162909 | -0.041130 | -1.418756 |
| 10 | 7 | 0 | -2.080427 | 1.801238  | -0.458170 |
| 11 | 1 | 0 | -2.919210 | 2.226603  | -0.075743 |
| 12 | 6 | 0 | -0.887245 | 2.633342  | -0.585342 |
| 13 | 6 | 0 | -1.240687 | 4.097513  | -0.297692 |
| 14 | 6 | 0 | 0.275012  | 2.184720  | 0.312094  |
| 15 | 8 | 0 | 1.433850  | 2.554792  | 0.041207  |
| 16 | 7 | 0 | -0.008631 | 1.419155  | 1.383078  |
| 17 | 1 | 0 | -0.961099 | 1.091732  | 1.511912  |

|    |   |   |           |           |           |
|----|---|---|-----------|-----------|-----------|
| 18 | 6 | 0 | 1.012807  | 0.928305  | 2.303139  |
| 19 | 6 | 0 | 0.352553  | 0.398744  | 3.581799  |
| 20 | 6 | 0 | 1.932101  | -0.142846 | 1.693250  |
| 21 | 8 | 0 | 3.026590  | -0.381257 | 2.238140  |
| 22 | 7 | 0 | 1.499261  | -0.803117 | 0.599980  |
| 23 | 1 | 0 | 0.614490  | -0.531784 | 0.176467  |
| 24 | 6 | 0 | 2.307203  | -1.795603 | -0.103206 |
| 25 | 6 | 0 | 1.402835  | -2.792783 | -0.838201 |
| 26 | 6 | 0 | 3.323319  | -1.184871 | -1.084026 |
| 27 | 8 | 0 | 4.194356  | -1.926146 | -1.591103 |
| 28 | 7 | 0 | 3.226960  | 0.117172  | -1.381614 |
| 29 | 1 | 0 | 2.529675  | 0.686935  | -0.912755 |
| 30 | 6 | 0 | 4.146055  | 0.772731  | -2.305537 |
| 31 | 1 | 0 | 3.890098  | 1.832259  | -2.346299 |
| 32 | 1 | 0 | 4.060559  | 0.345459  | -3.309628 |
| 33 | 1 | 0 | 5.181345  | 0.669348  | -1.965338 |
| 34 | 1 | 0 | 2.013773  | -3.539278 | -1.352452 |
| 35 | 1 | 0 | 0.775896  | -2.283041 | -1.578326 |
| 36 | 1 | 0 | 0.754651  | -3.310305 | -0.124123 |
| 37 | 1 | 0 | 2.902292  | -2.328491 | 0.643290  |
| 38 | 1 | 0 | 1.118911  | 0.045240  | 4.276722  |
| 39 | 1 | 0 | -0.328301 | -0.430339 | 3.358499  |
| 40 | 1 | 0 | -0.212373 | 1.200191  | 4.068584  |
| 41 | 1 | 0 | 1.674203  | 1.761856  | 2.556942  |
| 42 | 1 | 0 | -0.348146 | 4.721640  | -0.393196 |
| 43 | 1 | 0 | -1.642675 | 4.212880  | 0.715336  |
| 44 | 1 | 0 | -1.986563 | 4.450259  | -1.017232 |
| 45 | 1 | 0 | -0.509654 | 2.544658  | -1.608913 |
| 46 | 1 | 0 | -4.327772 | 1.121892  | -2.487766 |
| 47 | 1 | 0 | -5.252952 | -0.362754 | -2.192620 |
| 48 | 1 | 0 | -3.684716 | -0.442133 | -3.035855 |
| 49 | 1 | 0 | -4.131959 | 0.380677  | -0.106198 |
| 50 | 1 | 0 | -3.290562 | -4.028780 | -0.083203 |
| 51 | 1 | 0 | -3.558383 | -3.773484 | 1.662252  |
| 52 | 1 | 0 | -1.910922 | -3.771219 | 1.016574  |
